# Supplementary material for: Enhancing the detonation performance of azobistriazole energetic derivatives via inducing N-oxide groups
Source: Royal Society of Chemistry journal article supplement (doi:10.1039/d4cp00183d), 2024-01-01

## Supporting Information

### Enhancing the detonation performance of azobis-triazole energetic derivatives via inducing the *N*-oxide groups

Nan Li <sup>a,\*</sup>, Xinbo Yang <sup>a,b</sup>, Xiuyuan Li <sup>a</sup>, Zihuan Peng <sup>a</sup>, Zehong Yin <sup>a</sup>, Chongwen Jiang <sup>a</sup>, Zhihong Huang <sup>a</sup> and Yuchuan Li <sup>b,\*</sup>

<sup>a</sup> *School of Mechatronical Engineering, Beijing Institute of Technology, 5 South Zhongguancun Street, Haidian District, Beijing 100081, P. R. China.*

<sup>b</sup> *School of Material Science & Engineering, Beijing Institute of Technology, 5 South Zhongguancun Street, Haidian District, Beijing 100081, P. R. China.*

\* Corresponding Author: [leen04@bit.edu.cn](mailto:leen04@bit.edu.cn), [liyuchuan@bit.edu.cn](mailto:liyuchuan@bit.edu.cn)

## Detonation performance

For the Kamlet-Jacobs equation, calculations of detonation velocity and detonation pressure can be referenced in the literatures (*The Journal of Chemical Physics*, 1968, 48, 23-35(10.1063/1.1667908); *Central European Journal of Energetic Materials*, 2014, 11(4), 459-474). Among them, four parameters that affect detonation velocity and detonation pressure are determined in the Kamlet-Jacobs equation:

- (1) the number of moles  $N$  of gaseous detonation products per gram of explosive,
- (2) their average molecular mass  $\bar{M}$  in g/mol,
- (3) the magnitude of the heat release  $Q$  for the detonation reaction, in calories per gram of explosive,
- (4) its loading density  $\rho$  in g/cm<sup>3</sup>.

$$D = 1.01 \left( N \bar{M}^{\frac{1}{2}} Q^{\frac{1}{2}} \right)^{\frac{1}{2}} (1 + 1.30\rho)$$

$$P = 1.558 \rho^2 N \bar{M}^{\frac{1}{2}} Q^{\frac{1}{2}}$$

For EXPLO5, which can predict detonation (e.g. detonation velocity, pressure, energy, heat end temperature, etc.) and combustion (e.g. specific impulse, force, pressure, etc.) performance of energetic materials, is based on the chemical equilibrium steady-state model of detonation. The equilibrium composition of detonation and combustion products is calculated by applying modified White, Johnson, and Dantzig's free energy minimisation technique. The program uses the Becker-Kistiakowsky-Wilson (BKW) and exponential-6 equation of state (Exp-6 EOS) for gaseous detonation products, the ideal gas and virial equations of state of gaseous combustion products, and the Murnaghan equation of states for condensed products. EXPLO5 is designed so that enables calculation of chemical equilibrium composition and thermodynamic parameters of state along the shock adiabat of detonation products, the Chapman-Jouguet (C-J) state and the detonation parameters at the C-J state, as well as the parameters of state along the expansion isentrope. The program has non-linear curve fitting program built in to fit relative volume-pressure data along the expansion isentrope according to the Jones-Wilkins-Lee (JWL) model, enabling the calculation of the detonation energy available for performing mechanical work.

**Table S1.** Optimized azobis-triazole compounds (**A1** to **F1**) at computational levels with different functionals and different basis sets.

| <b>A1</b>         | Bond    | Length (Å) | Bond    | Length (Å) |
|-------------------|---------|------------|---------|------------|
| B3LYP/6-31G(d)    | C1-C2   | 1.367      | N8-C9   | 1.367      |
|                   | C2-N3   | 1.367      | N3-N6   | 1.370      |
|                   | N3-N13  | 1.372      | N7-N8   | 1.370      |
|                   | N13-N14 | 1.295      | N6-N7   | 1.248      |
|                   | N4-C1   | 1.376      | C1-H4   | 1.079      |
|                   | C9-C10  | 1.367      | C2-H5   | 1.077      |
|                   | C10-N16 | 1.367      | C9-H11  | 1.077      |
|                   | N16-N15 | 1.295      | C10-H12 | 1.079      |
| N15-N8            | 1.372   |            |         |            |
| <b>A1</b>         | Bond    | Length (Å) | Bond    | Length (Å) |
| B3LYP/6-31G(d,p)  | C1-C2   | 1.367      | N8-C9   | 1.367      |
|                   | C2-N3   | 1.367      | N3-N6   | 1.370      |
|                   | N3-N13  | 1.372      | N7-N8   | 1.370      |
|                   | N13-N14 | 1.295      | N6-N7   | 1.248      |
|                   | N4-C1   | 1.376      | C1-H4   | 1.079      |
|                   | C9-C10  | 1.367      | C2-H5   | 1.078      |
|                   | C10-N16 | 1.367      | C9-H11  | 1.078      |
|                   | N16-N15 | 1.295      | C10-H12 | 1.079      |
| N15-N8            | 1.372   |            |         |            |
| <b>A1</b>         | Bond    | Length (Å) | Bond    | Length (Å) |
| B3LYP/6-311G(d,p) | C1-C2   | 1.364      | N8-C9   | 1.366      |
|                   | C2-N3   | 1.366      | N3-N6   | 1.369      |
|                   | N3-N13  | 1.369      | N7-N8   | 1.369      |
|                   | N13-N14 | 1.290      | N6-N7   | 1.241      |
|                   | N4-C1   | 1.374      | C1-H4   | 1.077      |
|                   | C9-C10  | 1.364      | C2-H5   | 1.076      |
|                   | C10-N16 | 1.374      | C9-H11  | 1.076      |
|                   | N16-N15 | 1.290      | C10-H12 | 1.077      |
| N15-N8            | 1.369   |            |         |            |
| <b>A1</b>         | Bond    | Length (Å) | Bond    | Length (Å) |
| B3LYP/def2-TZVP   | C1-C2   | 1.367      | N8-C9   | 1.367      |
|                   | C2-N3   | 1.367      | N3-N6   | 1.370      |
|                   | N3-N13  | 1.372      | N7-N8   | 1.370      |
|                   | N13-N14 | 1.291      | N6-N7   | 1.248      |
|                   | N4-C1   | 1.374      | C1-H4   | 1.079      |
|                   | C9-C10  | 1.376      | C2-H5   | 1.078      |
| C10-N16           | 1.376   | C9-H11     | 1.078   |            |

|                   |         |            |         |            |
|-------------------|---------|------------|---------|------------|
|                   | N16-N15 | 1.291      | C10-H12 | 1.079      |
|                   | N15-N8  | 1.372      |         |            |
| <b>B1</b>         | Bond    | Length (Å) | Bond    | Length (Å) |
| B3LYP/6-31G(d)    | C1-N2   | 1.380      | N15-C7  | 1.302      |
|                   | N2-C13  | 1.386      | C1-H3   | 1.080      |
|                   | C13-N9  | 1.302      | C13-H14 | 1.078      |
|                   | N9-N16  | 1.399      | C11-H12 | 1.080      |
|                   | N16-C1  | 1.301      | C7-H8   | 1.078      |
|                   | C7-N6   | 1.386      | N5-N6   | 1.368      |
|                   | N6-C11  | 1.380      | N2-N4   | 1.368      |
|                   | C11-N10 | 1.301      | N4-N5   | 1.252      |
|                   | N10-N15 | 1.399      |         |            |
| <b>B1</b>         | Bond    | Length (Å) | Bond    | Length (Å) |
| B3LYP/6-31G(d,p)  | C1-N2   | 1.380      | N15-C7  | 1.303      |
|                   | N2-C13  | 1.386      | C1-H3   | 1.080      |
|                   | C13-N9  | 1.303      | C13-H14 | 1.078      |
|                   | N9-N16  | 1.398      | C11-H12 | 1.080      |
|                   | N16-C1  | 1.301      | C7-H8   | 1.078      |
|                   | C7-N6   | 1.386      | N5-N6   | 1.368      |
|                   | N6-C11  | 1.380      | N2-N4   | 1.368      |
|                   | C11-N10 | 1.301      | N4-N5   | 1.252      |
|                   | N10-N15 | 1.398      |         |            |
| <b>B1</b>         | Bond    | Length (Å) | Bond    | Length (Å) |
| B3LYP/6-311G(d,p) | C1-N2   | 1.500      | N15-C7  | 2.000      |
|                   | N2-C13  | 1.000      | C1-H3   | 1.000      |
|                   | C13-N9  | 2.000      | C13-H14 | 1.000      |
|                   | N9-N16  | 1.000      | C11-H12 | 1.000      |
|                   | N16-C1  | 2.000      | C7-H8   | 1.000      |
|                   | C7-N6   | 1.000      | N5-N6   | 1.000      |
|                   | N6-C11  | 1.500      | N2-N4   | 1.000      |
|                   | C11-N10 | 2.000      | N4-N5   | 2.000      |
|                   | N10-N15 | 1.000      |         |            |
| <b>B1</b>         | Bond    | Length (Å) | Bond    | Length (Å) |
| B3LYP/def2-TZVP   | C1-N2   | 1.376      | N15-C7  | 1.296      |
|                   | N2-C13  | 1.382      | C1-H3   | 1.077      |
|                   | C13-N9  | 1.296      | C13-H14 | 1.075      |
|                   | N9-N16  | 1.393      | C11-H12 | 1.077      |
|                   | N16-C1  | 1.294      | C7-H8   | 1.075      |
|                   | C7-N6   | 1.382      | N5-N6   | 1.363      |
|                   | N6-C11  | 1.376      | N2-N4   | 1.363      |
|                   | C11-N10 | 1.294      | N4-N5   | 1.240      |
|                   | N10-N15 | 1.393      |         |            |
| <b>C1</b>         | Bond    | Length (Å) | Bond    | Length (Å) |

|                   |             |                   |             |                   |
|-------------------|-------------|-------------------|-------------|-------------------|
| B3LYP/6-31G(d)    | C3-N13      | 1.364             | C7-C4       | 1.392             |
|                   | N13-N5      | 1.336             | C11-H12     | 1.079             |
|                   | N5-N10      | 1.318             | N13-H14     | 1.012             |
|                   | N10-C11     | 1.353             | N15-H16     | 1.012             |
|                   | C11-C3      | 1.392             | C7-H8       | 1.079             |
|                   | C4-N15      | 1.364             | C3-N2       | 1.380             |
|                   | N15-N6      | 1.336             | N2-N1       | 1.380             |
|                   | N6-N9       | 1.318             | N1-N2       | 1.272             |
|                   | N9-C7       | 1.353             |             |                   |
| <b>C1</b>         | <b>Bond</b> | <b>Length (Å)</b> | <b>Bond</b> | <b>Length (Å)</b> |
| B3LYP/6-31G(d,p)  | C3-N13      | 1.364             | C7-C4       | 1.392             |
|                   | N13-N5      | 1.337             | C11-H12     | 1.078             |
|                   | N5-N10      | 1.318             | N13-H14     | 1.011             |
|                   | N10-C11     | 1.353             | N15-H16     | 1.011             |
|                   | C11-C3      | 1.392             | C7-H8       | 1.078             |
|                   | C4-N15      | 1.364             | C3-N2       | 1.380             |
|                   | N15-N6      | 1.337             | N2-N1       | 1.380             |
|                   | N6-N9       | 1.318             | N1-N2       | 1.272             |
|                   | N9-C7       | 1.353             |             |                   |
| <b>C1</b>         | <b>Bond</b> | <b>Length (Å)</b> | <b>Bond</b> | <b>Length (Å)</b> |
| B3LYP/6-311G(d,p) | C3-N13      | 1.362             | C7-C4       | 1.389             |
|                   | N13-N5      | 1.334             | C11-H12     | 1.076             |
|                   | N5-N10      | 1.314             | N13-H14     | 1.010             |
|                   | N10-C11     | 1.351             | N15-H16     | 1.010             |
|                   | C11-C3      | 1.389             | C7-H8       | 1.076             |
|                   | C4-N15      | 1.363             | C3-N1       | 1.378             |
|                   | N15-N6      | 1.334             | N2-C4       | 1.378             |
|                   | N6-N9       | 1.314             | N1-N2       | 1.266             |
|                   | N9-C7       | 1.351             |             |                   |
| <b>C1</b>         | <b>Bond</b> | <b>Length (Å)</b> | <b>Bond</b> | <b>Length (Å)</b> |
| B3LYP/def2-TZVP   | C3-N13      | 1.359             | C7-C4       | 1.387             |
|                   | N13-N5      | 1.329             | C11-H12     | 1.075             |
|                   | N5-N10      | 1.311             | N13-H14     | 1.009             |
|                   | N10-C11     | 1.348             | N15-H16     | 1.009             |
|                   | C11-C3      | 1.387             | C7-H8       | 1.075             |
|                   | C4-N15      | 1.359             | C3-N1       | 1.376             |
|                   | N15-N6      | 1.329             | N2-C4       | 1.376             |
|                   | N6-N9       | 1.311             | N1-N2       | 1.260             |
|                   | N9-C7       | 1.348             |             |                   |
| <b>D1</b>         | <b>Bond</b> | <b>Length (Å)</b> | <b>Bond</b> | <b>Length (Å)</b> |
| B3LYP/6-31G(d)    | C16-N10     | 1.374             | N7-C15      | 1.325             |
|                   | N10-C13     | 1.356             | C11-H12     | 1.080             |
|                   | C13-N6      | 1.322             | N9-H4       | 1.011             |
|                   | N6-N5       | 1.368             | C13-H14     | 1.080             |

|                   |             |                   |             |                   |
|-------------------|-------------|-------------------|-------------|-------------------|
|                   | N5-C16      | 1.325             | N10-H1      | 1.011             |
|                   | C15-N9      | 1.374             | C16-N2      | 1.386             |
|                   | N9-C11      | 1.356             | C15-N3      | 1.386             |
|                   | C11-N8      | 1.322             | N2-N3       | 1.266             |
|                   | N8-N7       | 1.368             |             |                   |
| <b>D1</b>         | <b>Bond</b> | <b>Length (Å)</b> | <b>Bond</b> | <b>Length (Å)</b> |
|                   | C16-N10     | 1.373             | N7-C15      | 1.325             |
|                   | N10-C13     | 1.356             | C11-H12     | 1.080             |
|                   | C13-N6      | 1.322             | N9-H4       | 1.010             |
|                   | N6-N5       | 1.367             | C13-H14     | 1.080             |
| B3LYP/6-31G(d,p)  | N5-C16      | 1.325             | N10-H1      | 1.010             |
|                   | C15-N9      | 1.373             | C16-N2      | 1.386             |
|                   | N9-C11      | 1.356             | C15-N3      | 1.386             |
|                   | C11-N8      | 1.322             | N2-N3       | 1.266             |
|                   | N8-N7       | 1.367             |             |                   |
| <b>D1</b>         | <b>Bond</b> | <b>Length (Å)</b> | <b>Bond</b> | <b>Length (Å)</b> |
|                   | C16-N10     | 1.372             | N7-C15      | 1.320             |
|                   | N10-C13     | 1.355             | C11-H12     | 1.078             |
|                   | C13-N6      | 1.318             | N9-H4       | 1.009             |
|                   | N6-N5       | 1.365             | C13-H14     | 1.078             |
| B3LYP/6-311G(d,p) | N5-C16      | 1.320             | N10-H1      | 1.009             |
|                   | C15-N9      | 1.372             | C16-N2      | 1.384             |
|                   | N9-C11      | 1.355             | C15-N3      | 1.384             |
|                   | C11-N8      | 1.318             | N2-N3       | 1.260             |
|                   | N8-N7       | 1.365             |             |                   |
| <b>D1</b>         | <b>Bond</b> | <b>Length (Å)</b> | <b>Bond</b> | <b>Length (Å)</b> |
|                   | C16-N10     | 1.369             | N7-C15      | 1.317             |
|                   | N10-C13     | 1.351             | C11-H12     | 1.077             |
|                   | C13-N6      | 1.316             | N9-H4       | 1.077             |
|                   | N6-N5       | 1.362             | C13-H14     | 1.077             |
| B3LYP/def2-TZVP   | N5-C16      | 1.317             | N10-H1      | 1.077             |
|                   | C15-N9      | 1.369             | C16-N2      | 1.382             |
|                   | N9-C11      | 1.351             | C15-N3      | 1.382             |
|                   | C11-N8      | 1.316             | N2-N3       | 1.254             |
|                   | N8-N7       | 1.362             |             |                   |
| <b>E1</b>         | <b>Bond</b> | <b>Length (Å)</b> | <b>Bond</b> | <b>Length (Å)</b> |
|                   | N6-N16      | 1.342             | N9-N2       | 1.344             |
|                   | N16-C7      | 1.326             | C13-H14     | 1.081             |
|                   | C7-C13      | 1.417             | C7-H8       | 1.080             |
|                   | C13-N10     | 1.327             | C11-H12     | 1.081             |
| B3LYP/6-31G(d)    | N10-N6      | 1.344             | C1-H3       | 1.080             |
|                   | N2-N15      | 1.342             | N4-N2       | 1.370             |
|                   | N15-C1      | 1.326             | N5-N6       | 1.370             |
|                   | C1-C11      | 1.417             | N4-N5       | 1.249             |

|                   |         | C11-N9     | 1.327   |            |  |
|-------------------|---------|------------|---------|------------|--|
| <b>E1</b>         | Bond    | Length (Å) | Bond    | Length (Å) |  |
| B3LYP/6-31G(d,p)  | N6-N16  | 1.342      | N9-N2   | 1.344      |  |
|                   | N16-C7  | 1.326      | C13-H14 | 1.080      |  |
|                   | C7-C13  | 1.416      | C7-H8   | 1.080      |  |
|                   | C13-N10 | 1.327      | C11-H12 | 1.080      |  |
|                   | N10-N6  | 1.344      | C1-H3   | 1.080      |  |
|                   | N2-N15  | 1.342      | N4-N2   | 1.370      |  |
|                   | N15-C1  | 1.326      | N5-N6   | 1.370      |  |
|                   | C1-C11  | 1.416      | N4-N5   | 1.249      |  |
|                   | C11-N9  | 1.327      |         |            |  |
| <b>E1</b>         | Bond    | Length (Å) | Bond    | Length (Å) |  |
| B3LYP/6-311G(d,p) | N6-N16  | 1.339      | N9-N2   | 1.341      |  |
|                   | N16-C7  | 1.322      | C13-H14 | 1.079      |  |
|                   | C7-C13  | 1.416      | C7-H8   | 1.078      |  |
|                   | C13-N10 | 1.323      | C11-H12 | 1.079      |  |
|                   | N10-N6  | 1.341      | C1-H3   | 1.078      |  |
|                   | N2-N15  | 1.339      | N4-N2   | 1.368      |  |
|                   | N15-C1  | 1.322      | N5-N6   | 1.368      |  |
|                   | C1-C11  | 1.416      | N4-N5   | 1.242      |  |
|                   | C11-N9  | 1.323      |         |            |  |
| <b>E1</b>         | Bond    | Length (Å) | Bond    | Length (Å) |  |
| B3LYP/def2-TZVP   | N6-N16  | 1.335      | N9-N2   | 1.336      |  |
|                   | N16-C7  | 1.320      | C13-H14 | 1.077      |  |
|                   | C7-C13  | 1.412      | C7-H8   | 1.077      |  |
|                   | C13-N10 | 1.321      | C11-H12 | 1.077      |  |
|                   | N10-N6  | 1.336      | C1-H3   | 1.077      |  |
|                   | N2-N15  | 1.335      | N4-N2   | 1.364      |  |
|                   | N15-C1  | 1.320      | N5-N6   | 1.364      |  |
|                   | C1-C11  | 1.412      | N4-N5   | 1.238      |  |
|                   | C11-N9  | 1.321      |         |            |  |
| <b>F1</b>         | Bond    | Length (Å) | Bond    | Length (Å) |  |
| B3LYP/6-31G(d)    | N4-C13  | 1.367      | N5-N1   | 1.364      |  |
|                   | C13-N16 | 1.311      | C9-H10  | 1.082      |  |
|                   | N16-C9  | 1.374      | C13-H14 | 1.081      |  |
|                   | C9-N6   | 1.320      | C7-H8   | 1.082      |  |
|                   | N6-N4   | 1.364      | C11-H12 | 1.081      |  |
|                   | N1-C11  | 1.367      | N4-N3   | 1.366      |  |
|                   | C11-N15 | 1.311      | N1-N2   | 1.366      |  |
|                   | N15-C7  | 1.374      | N2-N3   | 1.249      |  |
|                   | C7-N5   | 1.320      |         |            |  |
| <b>F1</b>         | Bond    | Length (Å) | Bond    | Length (Å) |  |
| B3LYP/6-31G(d,p)  | N4-C13  | 1.367      | N5-N1   | 1.363      |  |

|                   |             |                   |             |                   |
|-------------------|-------------|-------------------|-------------|-------------------|
|                   | C13-N16     | 1.312             | C9-H10      | 1.081             |
|                   | N16-C9      | 1.374             | C13-H14     | 1.080             |
|                   | C9-N6       | 1.321             | C7-H8       | 1.081             |
|                   | N6-N4       | 1.363             | C11-H12     | 1.080             |
|                   | N1-C11      | 1.367             | N4-N3       | 1.366             |
|                   | C11-N15     | 1.312             | N1-N2       | 1.366             |
|                   | N15-C7      | 1.374             | N2-N3       | 1.249             |
|                   | C7-N5       | 1.321             |             |                   |
| <b>F1</b>         | <b>Bond</b> | <b>Length (Å)</b> | <b>Bond</b> | <b>Length (Å)</b> |
|                   | N4-C13      | 1.367             | N5-N1       | 1.360             |
|                   | C13-N16     | 1.308             | C9-H10      | 1.079             |
|                   | N16-C9      | 1.373             | C13-H14     | 1.078             |
|                   | C9-N6       | 1.317             | C7-H8       | 1.079             |
| B3LYP/6-311G(d,p) | N6-N4       | 1.360             | C11-H12     | 1.078             |
|                   | N1-C11      | 1.367             | N4-N3       | 1.364             |
|                   | C11-N15     | 1.308             | N1-N2       | 1.364             |
|                   | N15-C7      | 1.373             | N2-N3       | 1.242             |
|                   | C7-N5       | 1.317             |             |                   |
| <b>F1</b>         | <b>Bond</b> | <b>Length (Å)</b> | <b>Bond</b> | <b>Length (Å)</b> |
|                   | N4-C13      | 1.362             | N5-N1       | 1.357             |
|                   | C13-N16     | 1.306             | C9-H10      | 1.078             |
|                   | N16-C9      | 1.369             | C13-H14     | 1.077             |
|                   | C9-N6       | 1.314             | C7-H8       | 1.078             |
| B3LYP/def2-TZVP   | N6-N4       | 1.357             | C11-H12     | 1.077             |
|                   | N1-C11      | 1.362             | N4-N3       | 1.361             |
|                   | C11-N15     | 1.306             | N1-N2       | 1.361             |
|                   | N15-C7      | 1.369             | N2-N3       | 1.238             |
|                   | C7-N5       | 1.314             |             |                   |
| <b>A1</b>         | <b>Bond</b> | <b>Length (Å)</b> | <b>Bond</b> | <b>Length (Å)</b> |
|                   | C1-C2       | 1.360             | N8-C9       | 1.357             |
|                   | C2-N3       | 1.357             | N3-N6       | 1.365             |
|                   | N3-N13      | 1.344             | N7-N8       | 1.365             |
|                   | N13-N14     | 1.281             | N6-N7       | 1.226             |
| M06-2X/631G(d)    | N4-C1       | 1.368             | C1-H4       | 1.075             |
|                   | C9-C10      | 1.360             | C2-H5       | 1.075             |
|                   | C10-N16     | 1.368             | C9-H11      | 1.075             |
|                   | N16-N15     | 1.281             | C10-H12     | 1.075             |
|                   | N15-N8      | 1.344             |             |                   |
| <b>A1</b>         | <b>Bond</b> | <b>Length (Å)</b> | <b>Bond</b> | <b>Length (Å)</b> |
|                   | C1-C2       | 1.364             | N8-C9       | 1.361             |
|                   | C2-N3       | 1.361             | N3-N6       | 1.368             |
| M06-2X/6-31G(d,p) | N3-N13      | 1.351             | N7-N8       | 1.368             |
|                   | N13-N14     | 1.285             | N6-N7       | 1.235             |
|                   | N14-C1      | 1.371             | C1-H4       | 1.078             |



|                    |             |                   |             |                   |
|--------------------|-------------|-------------------|-------------|-------------------|
|                    | C9-C10      | 1.364             | C2-H5       | 1.078             |
|                    | C10-N16     | 1.371             | C9-H11      | 1.078             |
|                    | N16-N15     | 1.285             | C10-H12     | 1.078             |
|                    | N15-N8      | 1.351             |             |                   |
| <b>A1</b>          | <b>Bond</b> | <b>Length (Å)</b> | <b>Bond</b> | <b>Length (Å)</b> |
| M06-2X/6-311G(d,p) | C1-C2       | 1.364             | N8-C9       | 1.361             |
|                    | C2-N3       | 1.361             | N3-N6       | 1.368             |
|                    | N3-N13      | 1.351             | N7-N8       | 1.368             |
|                    | N13-N14     | 1.285             | N6-N7       | 1.235             |
|                    | N14-C1      | 1.372             | C1-H4       | 1.078             |
|                    | C9-C10      | 1.364             | C2-H5       | 1.077             |
|                    | C10-N16     | 1.372             | C9-H11      | 1.077             |
|                    | N16-N15     | 1.285             | C10-H12     | 1.078             |
|                    | N15-N8      | 1.351             |             |                   |
| <b>A1</b>          | <b>Bond</b> | <b>Length (Å)</b> | <b>Bond</b> | <b>Length (Å)</b> |
| M06-2X/def2-TZVP   | C1-C2       | 1.362             | N8-C9       | 1.360             |
|                    | C2-N3       | 1.360             | N3-N6       | 1.367             |
|                    | N3-N13      | 1.349             | N7-N8       | 1.367             |
|                    | N13-N14     | 1.282             | N6-N7       | 1.229             |
|                    | N14-C1      | 1.371             | C1-H4       | 1.076             |
|                    | C9-C10      | 1.362             | C2-H5       | 1.076             |
|                    | C10-N16     | 1.371             | C9-H11      | 1.076             |
|                    | N16-N15     | 1.282             | C10-H12     | 1.076             |
|                    | N15-N8      | 1.349             |             |                   |
| <b>B1</b>          | <b>Bond</b> | <b>Length (Å)</b> | <b>Bond</b> | <b>Length (Å)</b> |
| M06-2X/6-31G(d)    | C1-N2       | 1.370             | N15-C7      | 1.292             |
|                    | N2-C13      | 1.376             | C1-H3       | 1.077             |
|                    | C13-N9      | 1.292             | C13-H14     | 1.076             |
|                    | N9-N16      | 1.381             | C11-H12     | 1.077             |
|                    | N16-C1      | 1.291             | C7-H8       | 1.076             |
|                    | C7-N6       | 1.376             | N5-N6       | 1.360             |
|                    | N6-C11      | 1.370             | N2-N4       | 1.360             |
|                    | C11-N10     | 1.291             | N4-N5       | 1.229             |
|                    | N10-N15     | 1.381             |             |                   |
| <b>B1</b>          | <b>Bond</b> | <b>Length (Å)</b> | <b>Bond</b> | <b>Length (Å)</b> |
| M06-2X/6-31G(d,p)  | C1-N2       | 1.374             | N15-C7      | 1.297             |
|                    | N2-C13      | 1.379             | C1-H3       | 1.080             |
|                    | C13-N9      | 1.297             | C13-H14     | 1.079             |
|                    | N9-N16      | 1.384             | C11-H12     | 1.080             |
|                    | N16-C1      | 1.296             | C7-H8       | 1.079             |
|                    | C7-N6       | 1.379             | N5-N6       | 1.363             |
|                    | N6-C11      | 1.374             | N2-N4       | 1.363             |
|                    | C11-N10     | 1.296             | N4-N5       | 1.239             |

|                    |         | N10-N15    | 1.384   |            |  |
|--------------------|---------|------------|---------|------------|--|
| <b>B1</b>          | Bond    | Length (Å) | Bond    | Length (Å) |  |
| M06-2X/6-311G(d,p) | C1-N2   | 1.373      | N15-C7  | 1.298      |  |
|                    | N2-C13  | 1.379      | C1-H3   | 1.079      |  |
|                    | C13-N9  | 1.298      | C13-H14 | 1.078      |  |
|                    | N9-N16  | 1.383      | C11-H12 | 1.079      |  |
|                    | N16-C1  | 1.296      | C7-H8   | 1.078      |  |
|                    | C7-N6   | 1.379      | N5-N6   | 1.363      |  |
|                    | N6-C11  | 1.373      | N2-N4   | 1.363      |  |
|                    | C11-N10 | 1.296      | N4-N5   | 1.239      |  |
|                    | N10-N15 | 1.383      |         |            |  |
| <b>B1</b>          | Bond    | Length (Å) | Bond    | Length (Å) |  |
| M06-2X/def2-TZVP   | C1-N2   | 1.374      | N15-C7  | 1.294      |  |
|                    | N2-C13  | 1.380      | C1-H3   | 1.078      |  |
|                    | C13-N9  | 1.294      | C13-H14 | 1.076      |  |
|                    | N9-N16  | 1.384      | C11-H12 | 1.078      |  |
|                    | N16-C1  | 1.292      | C7-H8   | 1.076      |  |
|                    | C7-N6   | 1.380      | N5-N6   | 1.362      |  |
|                    | N6-C11  | 1.374      | N2-N4   | 1.362      |  |
|                    | C11-N10 | 1.292      | N4-N5   | 1.233      |  |
|                    | N10-N15 | 1.384      |         |            |  |
| <b>C1</b>          | Bond    | Length (Å) | Bond    | Length (Å) |  |
| M06-2X/6-31G(d)    | C3-N13  | 1.352      | C7-C4   | 1.378      |  |
|                    | N13-N5  | 1.320      | C11-H12 | 1.075      |  |
|                    | N5-N10  | 1.300      | N13-H14 | 1.009      |  |
|                    | N10-C11 | 1.349      | N15-H16 | 1.009      |  |
|                    | C11-C3  | 1.378      | C7-H8   | 1.075      |  |
|                    | C4-N15  | 1.352      | C3-N1   | 1.386      |  |
|                    | N15-N6  | 1.320      | N2-C4   | 1.386      |  |
|                    | N6-N9   | 1.300      | N1-N2   | 1.244      |  |
|                    | N9-C7   | 1.349      |         |            |  |
| <b>C1</b>          | Bond    | Length (Å) | Bond    | Length (Å) |  |
| M06-2X/6-31G(d,p)  | C3-N13  | 1.356      | C7-C4   | 1.383      |  |
|                    | N13-N5  | 1.325      | C11-H12 | 1.078      |  |
|                    | N5-N10  | 1.305      | N13-H14 | 1.012      |  |
|                    | N10-C11 | 1.352      | N15-H16 | 1.012      |  |
|                    | C11-C3  | 1.383      | C7-H8   | 1.078      |  |
|                    | C4-N15  | 1.356      | C3-N1   | 1.388      |  |
|                    | N15-N6  | 1.325      | N2-N4   | 1.388      |  |
|                    | N6-N9   | 1.305      | N1-N2   | 1.254      |  |
|                    | N9-C7   | 1.352      |         |            |  |
| <b>C1</b>          | Bond    | Length (Å) | Bond    | Length (Å) |  |
| M06-2X/6-311G(d,p) | C3-N13  | 1.355      | C7-C4   | 1.382      |  |

|                    |             |                   |             |                   |
|--------------------|-------------|-------------------|-------------|-------------------|
|                    | N13-N5      | 1.326             | C11-H12     | 1.078             |
|                    | N5-N10      | 1.304             | N13-H14     | 1.010             |
|                    | N10-C11     | 1.352             | N15-H16     | 1.010             |
|                    | C11-C3      | 1.382             | C7-H8       | 1.078             |
|                    | C4-N15      | 1.355             | C3-N1       | 1.388             |
|                    | N15-N6      | 1.326             | N2-C4       | 1.388             |
|                    | N6-N9       | 1.304             | N1-N2       | 1.254             |
|                    | N9-C7       | 1.352             |             |                   |
| <b>C1</b>          | <b>Bond</b> | <b>Length (Å)</b> | <b>Bond</b> | <b>Length (Å)</b> |
|                    | C3-N13      | 1.355             | C7-C4       | 1.380             |
|                    | N13-N5      | 1.324             | C11-H12     | 1.076             |
|                    | N5-N10      | 1.301             | N13-H14     | 1.010             |
|                    | N10-C11     | 1.351             | N15-H16     | 1.010             |
| M06-2X/def2-TZVP   | C11-C3      | 1.380             | C7-H8       | 1.076             |
|                    | C4-N15      | 1.355             | C3-N1       | 1.387             |
|                    | N15-N6      | 1.324             | N2-C4       | 1.387             |
|                    | N6-N9       | 1.301             | N1-N2       | 1.249             |
|                    | N9-C7       | 1.351             |             |                   |
| <b>D1</b>          | <b>Bond</b> | <b>Length (Å)</b> | <b>Bond</b> | <b>Length (Å)</b> |
|                    | C16-N10     | 1.361             | N7-C15      | 1.307             |
|                    | N10-C13     | 1.350             | C11-H12     | 1.077             |
|                    | C13-N6      | 1.309             | N9-H4       | 1.007             |
|                    | N6-N5       | 1.357             | C13-H14     | 1.077             |
| M06-2X/6-31G(d)    | N5-C16      | 1.307             | N10-H1      | 1.007             |
|                    | C15-N9      | 1.361             | C16-N2      | 1.394             |
|                    | N9-C11      | 1.350             | C15-N3      | 1.394             |
|                    | C11-N8      | 1.309             | N2-N3       | 1.238             |
|                    | N8-N7       | 1.357             |             |                   |
| <b>D1</b>          | <b>Bond</b> | <b>Length (Å)</b> | <b>Bond</b> | <b>Length (Å)</b> |
|                    | C16-N10     | 1.365             | N7-C15      | 1.313             |
|                    | N10-C13     | 1.353             | C11-H12     | 1.080             |
|                    | C13-N6      | 1.315             | N9-H4       | 1.011             |
|                    | N6-N5       | 1.359             | C13-H14     | 1.080             |
| M06-2X/6-31G(d,p)  | N5-C16      | 1.313             | N10-H1      | 1.011             |
|                    | C15-N9      | 1.365             | C16-N2      | 1.395             |
|                    | N9-C11      | 1.353             | C15-N3      | 1.395             |
|                    | C11-N8      | 1.315             | N2-N3       | 1.249             |
|                    | N8-N7       | 1.359             |             |                   |
| <b>D1</b>          | <b>Bond</b> | <b>Length (Å)</b> | <b>Bond</b> | <b>Length (Å)</b> |
|                    | C16-N10     | 1.364             | N7-C15      | 1.313             |
|                    | N10-C13     | 1.353             | C11-H12     | 1.079             |
| M06-2X/6-311G(d,p) | C13-N6      | 1.315             | N9-H4       | 1.009             |
|                    | N6-N5       | 1.359             | C13-H14     | 1.079             |
|                    | N5-C16      | 1.313             | N10-H1      | 1.009             |

|                    |         |            |         |            |
|--------------------|---------|------------|---------|------------|
|                    | C15-N9  | 1.364      | C16-N2  | 1.396      |
|                    | N9-C11  | 1.353      | C15-N3  | 1.396      |
|                    | C11-N8  | 1.315      | N2-N3   | 1.249      |
|                    | N8-N7   | 1.359      |         |            |
| <b>D1</b>          | Bond    | Length (Å) | Bond    | Length (Å) |
|                    | C16-N10 | 1.364      | N7-C15  | 1.309      |
|                    | N10-C13 | 1.353      | C11-H12 | 1.077      |
|                    | C13-N6  | 1.311      | N9-H4   | 1.009      |
|                    | N6-N5   | 1.358      | C13-H14 | 1.077      |
| M06-2X/def2-TZVP   | N5-C16  | 1.309      | N10-H1  | 1.009      |
|                    | C15-N9  | 1.364      | C16-N2  | 1.394      |
|                    | N9-C11  | 1.353      | C15-N3  | 1.394      |
|                    | C11-N8  | 1.311      | N2-N3   | 1.243      |
|                    | N8-N7   | 1.358      |         |            |
| <b>E1</b>          | Bond    | Length (Å) | Bond    | Length (Å) |
|                    | N6-N16  | 1.323      | N9-N2   | 1.323      |
|                    | N16-C7  | 1.316      | C13-H14 | 1.077      |
|                    | C7-C13  | 1.411      | C7-H8   | 1.076      |
|                    | C13-N10 | 1.317      | C11-H12 | 1.077      |
| M06-2X/6-31G(d)    | N10-N6  | 1.323      | C1-H3   | 1.076      |
|                    | N2-N15  | 1.323      | N4-N2   | 1.365      |
|                    | N15-C1  | 1.316      | N5-N6   | 1.365      |
|                    | C1-C11  | 1.411      | N4-N5   | 1.226      |
|                    | C11-N9  | 1.317      |         |            |
| <b>E1</b>          | Bond    | Length (Å) | Bond    | Length (Å) |
|                    | N6-N16  | 1.328      | N9-N2   | 1.329      |
|                    | N16-C7  | 1.320      | C13-H14 | 1.080      |
|                    | C7-C13  | 1.415      | C7-H8   | 1.079      |
|                    | C13-N10 | 1.321      | C11-H12 | 1.080      |
| M06-2X/6-31G(d,p)  | N10-N6  | 1.329      | C1-H3   | 1.079      |
|                    | N2-N15  | 1.328      | N4-N2   | 1.368      |
|                    | N15-C1  | 1.320      | N5-N6   | 1.368      |
|                    | C1-C11  | 1.415      | N4-N5   | 1.235      |
|                    | C11-N9  | 1.321      |         |            |
| <b>E1</b>          | Bond    | Length (Å) | Bond    | Length (Å) |
|                    | N6-N16  | 1.328      | N9-N2   | 1.329      |
|                    | N16-C7  | 1.320      | C13-H14 | 1.079      |
|                    | C7-C13  | 1.415      | C7-H8   | 1.079      |
|                    | C13-N10 | 1.321      | C11-H12 | 1.079      |
| M06-2X/6-311G(d,p) | N10-N6  | 1.329      | C1-H3   | 1.079      |
|                    | N2-N15  | 1.328      | N4-N2   | 1.368      |
|                    | N15-C1  | 1.320      | N5-N6   | 1.368      |
|                    | C1-C11  | 1.415      | N4-N5   | 1.235      |

|                    |         | C11-N9     | 1.321   |            |  |
|--------------------|---------|------------|---------|------------|--|
| <b>E1</b>          | Bond    | Length (Å) | Bond    | Length (Å) |  |
| M06-2X/def2-TZVP   | N6-N16  | 1.326      | N9-N2   | 1.328      |  |
|                    | N16-C7  | 1.317      | C13-H14 | 1.078      |  |
|                    | C7-C13  | 1.414      | C7-H8   | 1.077      |  |
|                    | C13-N10 | 1.318      | C11-H12 | 1.078      |  |
|                    | N10-N6  | 1.328      | C1-H3   | 1.077      |  |
|                    | N2-N15  | 1.326      | N4-N2   | 1.368      |  |
|                    | N15-C1  | 1.317      | N5-N6   | 1.368      |  |
|                    | C1-C11  | 1.414      | N4-N5   | 1.230      |  |
|                    | C11-N9  | 1.318      |         |            |  |
| <b>F1</b>          | Bond    | Length (Å) | Bond    | Length (Å) |  |
| M06-2X/6-31G(d)    | N4-C13  | 1.355      | N5-N1   | 1.345      |  |
|                    | C13-N16 | 1.303      | C9-H10  | 1.078      |  |
|                    | N16-C9  | 1.367      | C13-H14 | 1.078      |  |
|                    | C9-N6   | 1.310      | C7-H8   | 1.078      |  |
|                    | N6-N4   | 1.345      | C11-H12 | 1.078      |  |
|                    | N1-C11  | 1.355      | N4-N3   | 1.360      |  |
|                    | C11-N15 | 1.303      | N1-N2   | 1.360      |  |
|                    | N15-C7  | 1.367      | N2-N3   | 1.227      |  |
|                    | C7-N5   | 1.310      |         |            |  |
| <b>F1</b>          | Bond    | Length (Å) | Bond    | Length (Å) |  |
| M06-2X/6-31G(d,p)  | N4-C13  | 1.359      | N5-N1   | 1.349      |  |
|                    | C13-N16 | 1.306      | C9-H10  | 1.081      |  |
|                    | N16-C9  | 1.370      | C13-H14 | 1.081      |  |
|                    | C9-N6   | 1.315      | C7-H8   | 1.081      |  |
|                    | N6-N4   | 1.349      | C11-H12 | 1.081      |  |
|                    | N1-C11  | 1.359      | N4-N3   | 1.363      |  |
|                    | C11-N15 | 1.306      | N1-N2   | 1.363      |  |
|                    | N15-C7  | 1.370      | N2-N3   | 1.236      |  |
|                    | C7-N5   | 1.315      |         |            |  |
| <b>F1</b>          | Bond    | Length (Å) | Bond    | Length (Å) |  |
| M06-2X/6-311G(d,p) | N4-C13  | 1.359      | N5-N1   | 1.349      |  |
|                    | C13-N16 | 1.307      | C9-H10  | 1.080      |  |
|                    | N16-C9  | 1.370      | C13-H14 | 1.080      |  |
|                    | C9-N6   | 1.315      | C7-H8   | 1.080      |  |
|                    | N6-N4   | 1.349      | C11-H12 | 1.080      |  |
|                    | N1-C11  | 1.359      | N4-N3   | 1.363      |  |
|                    | C11-N15 | 1.307      | N1-N2   | 1.363      |  |
|                    | N15-C7  | 1.370      | N2-N3   | 1.236      |  |
|                    | C7-N5   | 1.315      |         |            |  |
| <b>F1</b>          | Bond    | Length (Å) | Bond    | Length (Å) |  |
| M06-2X/def2-TZVP   | N4-C13  | 1.359      | N5-N1   | 1.348      |  |

|                  |             |                   |             |                   |
|------------------|-------------|-------------------|-------------|-------------------|
|                  | C13-N16     | 1.304             | C9-H10      | 1.079             |
|                  | N16-C9      | 1.369             | C13-H14     | 1.079             |
|                  | C9-N6       | 1.312             | C7-H8       | 1.079             |
|                  | N6-N4       | 1.348             | C11-H12     | 1.079             |
|                  | N1-C11      | 1.359             | N4-N3       | 1.362             |
|                  | C11-N15     | 1.304             | N1-N2       | 1.362             |
|                  | N15-C7      | 1.369             | N2-N3       | 1.230             |
|                  | C7-N5       | 1.312             |             |                   |
| <b>A1</b>        | <b>Bond</b> | <b>Length (Å)</b> | <b>Bond</b> | <b>Length (Å)</b> |
|                  | C1-C2       | 1.359             | N8-C9       | 1.357             |
|                  | C2-N3       | 1.357             | N3-N6       | 1.356             |
|                  | N3-N13      | 1.347             | N7-N8       | 1.356             |
|                  | N13-N14     | 1.283             | N6-N7       | 1.232             |
| PBE0/6-31G(d)    | N4-C1       | 1.365             | C1-H4       | 1.077             |
|                  | C9-C10      | 1.359             | C2-H5       | 1.076             |
|                  | C10-N16     | 1.365             | C9-H11      | 1.076             |
|                  | N16-N15     | 1.283             | C10-H12     | 1.077             |
|                  | N15-N8      | 1.347             |             |                   |
| <b>A1</b>        | <b>Bond</b> | <b>Length (Å)</b> | <b>Bond</b> | <b>Length (Å)</b> |
|                  | C1-C2       | 1.364             | N8-C9       | 1.361             |
|                  | C2-N3       | 1.361             | N3-N6       | 1.360             |
|                  | N3-N13      | 1.354             | N7-N8       | 1.360             |
|                  | N13-N14     | 1.288             | N6-N7       | 1.241             |
| PBE0/6-31G(d,p)  | N14-C1      | 1.369             | C1-H4       | 1.080             |
|                  | C9-C10      | 1.364             | C2-H5       | 1.078             |
|                  | C10-N16     | 1.369             | C9-H11      | 1.078             |
|                  | N16-N15     | 1.288             | C10-H12     | 1.080             |
|                  | N15-N8      | 1.354             |             |                   |
| <b>A1</b>        | <b>Bond</b> | <b>Length (Å)</b> | <b>Bond</b> | <b>Length (Å)</b> |
|                  | C1-C2       | 1.364             | N8-C9       | 1.361             |
|                  | C2-N3       | 1.361             | N3-N6       | 1.360             |
|                  | N3-N13      | 1.354             | N7-N8       | 1.360             |
|                  | N13-N14     | 1.288             | N6-N7       | 1.241             |
| PBE0/6-311G(d,p) | N14-C1      | 1.369             | C1-H4       | 1.079             |
|                  | C9-C10      | 1.364             | C2-H5       | 1.078             |
|                  | C10-N16     | 1.369             | C9-H11      | 1.078             |
|                  | N16-N15     | 1.288             | C10-H12     | 1.079             |
|                  | N15-N8      | 1.354             |             |                   |
| <b>A1</b>        | <b>Bond</b> | <b>Length (Å)</b> | <b>Bond</b> | <b>Length (Å)</b> |
|                  | C1-C2       | 1.362             | N8-C9       | 1.360             |
|                  | C2-N3       | 1.360             | N3-N6       | 1.358             |
|                  | N3-N13      | 1.352             | N7-N8       | 1.358             |
| PBE0/def2-TZVP   | N13-N14     | 1.283             | N6-N7       | 1.235             |
|                  | N14-C1      | 1.367             | C1-H4       | 1.078             |

|                  |         |            |         |            |
|------------------|---------|------------|---------|------------|
|                  | C9-C10  | 1.362      | C2-H5   | 1.077      |
|                  | C10-N16 | 1.367      | C9-H11  | 1.077      |
|                  | N16-N15 | 1.283      | C10-H12 | 1.078      |
|                  | N15-N8  | 1.352      |         |            |
| <b>B1</b>        | Bond    | Length (Å) | Bond    | Length (Å) |
| PBE0/6-31G(d)    | C1-N2   | 1.369      | N15-C7  | 1.294      |
|                  | N2-C13  | 1.374      | C1-H3   | 1.079      |
|                  | C13-N9  | 1.294      | C13-H14 | 1.077      |
|                  | N9-N16  | 1.378      | C11-H12 | 1.079      |
|                  | N16-C1  | 1.292      | C7-H8   | 1.077      |
|                  | C7-N6   | 1.374      | N5-N6   | 1.353      |
|                  | N6-C11  | 1.369      | N2-N4   | 1.353      |
|                  | C11-N10 | 1.292      | N4-N5   | 1.235      |
|                  | N10-N15 | 1.378      |         |            |
| <b>B1</b>        | Bond    | Length (Å) | Bond    | Length (Å) |
| PBE0/6-31G(d,p)  | C1-N2   | 1.373      | N15-C7  | 1.299      |
|                  | N2-C13  | 1.377      | C1-H3   | 1.080      |
|                  | C13-N9  | 1.299      | C13-H14 | 1.079      |
|                  | N9-N16  | 1.383      | C11-H12 | 1.080      |
|                  | N16-C1  | 1.297      | C7-H8   | 1.079      |
|                  | C7-N6   | 1.377      | N5-N6   | 1.357      |
|                  | N6-C11  | 1.373      | N2-N4   | 1.357      |
|                  | C11-N10 | 1.297      | N4-N5   | 1.245      |
|                  | N10-N15 | 1.383      |         |            |
| <b>B1</b>        | Bond    | Length (Å) | Bond    | Length (Å) |
| PBE0/6-311G(d,p) | C1-N2   | 1.373      | N15-C7  | 1.299      |
|                  | N2-C13  | 1.377      | C1-H3   | 1.080      |
|                  | C13-N9  | 1.299      | C13-H14 | 1.078      |
|                  | N9-N16  | 1.382      | C11-H12 | 1.080      |
|                  | N16-C1  | 1.298      | C7-H8   | 1.078      |
|                  | C7-N6   | 1.377      | N5-N6   | 1.357      |
|                  | N6-C11  | 1.373      | N2-N4   | 1.357      |
|                  | C11-N10 | 1.298      | N4-N5   | 1.245      |
|                  | N10-N15 | 1.382      |         |            |
| <b>B1</b>        | Bond    | Length (Å) | Bond    | Length (Å) |
| PBE0/def2-TZVP   | C1-N2   | 1.372      | N15-C7  | 1.295      |
|                  | N2-C13  | 1.377      | C1-H3   | 1.079      |
|                  | C13-N9  | 1.295      | C13-H14 | 1.077      |
|                  | N9-N16  | 1.381      | C11-H12 | 1.079      |
|                  | N16-C1  | 1.294      | C7-H8   | 1.077      |
|                  | C7-N6   | 1.377      | N5-N6   | 1.355      |
|                  | N6-C11  | 1.372      | N2-N4   | 1.355      |
|                  | C11-N10 | 1.294      | N4-N5   | 1.238      |

|                  |         | N10-N15    | 1.381   |            |  |
|------------------|---------|------------|---------|------------|--|
| <b>C1</b>        | Bond    | Length (Å) | Bond    | Length (Å) |  |
| PBE0/6-31G(d)    | C3-N13  | 1.353      | C7-C4   | 1.383      |  |
|                  | N13-N5  | 1.318      | C11-H12 | 1.077      |  |
|                  | N5-N10  | 1.303      | N13-H14 | 1.008      |  |
|                  | N10-C11 | 1.344      | N15-H16 | 1.008      |  |
|                  | C11-C3  | 1.383      | C7-H8   | 1.077      |  |
|                  | C4-N15  | 1.353      | C3-N2   | 1.373      |  |
|                  | N15-N6  | 1.318      | N2-N1   | 1.373      |  |
|                  | N6-N9   | 1.303      | N1-N2   | 1.253      |  |
|                  | N9-C7   | 1.344      |         |            |  |
| <b>C1</b>        | Bond    | Length (Å) | Bond    | Length (Å) |  |
| PBE0/6-31G(d,p)  | C3-N13  | 1.357      | C7-C4   | 1.387      |  |
|                  | N13-N5  | 1.324      | C11-H12 | 1.079      |  |
|                  | N5-N10  | 1.309      | N13-H14 | 1.011      |  |
|                  | N10-C11 | 1.347      | N15-H16 | 1.011      |  |
|                  | C11-C3  | 1.387      | C7-H8   | 1.079      |  |
|                  | C4-N15  | 1.357      | C3-N1   | 1.376      |  |
|                  | N15-N6  | 1.324      | N2-N4   | 1.376      |  |
|                  | N6-N9   | 1.309      | N1-N2   | 1.263      |  |
|                  | N9-C7   | 1.347      |         |            |  |
| <b>C1</b>        | Bond    | Length (Å) | Bond    | Length (Å) |  |
| PBE0/6-311G(d,p) | C3-N13  | 1.357      | C7-C4   | 1.387      |  |
|                  | N13-N5  | 1.325      | C11-H12 | 1.079      |  |
|                  | N5-N10  | 1.309      | N13-H14 | 1.010      |  |
|                  | N10-C11 | 1.348      | N15-H16 | 1.010      |  |
|                  | C11-C3  | 1.387      | C7-H8   | 1.079      |  |
|                  | C4-N15  | 1.357      | C3-N1   | 1.376      |  |
|                  | N15-N6  | 1.325      | N2-C4   | 1.376      |  |
|                  | N6-N9   | 1.309      | N1-N2   | 1.263      |  |
|                  | N9-C7   | 1.348      |         |            |  |
| <b>C1</b>        | Bond    | Length (Å) | Bond    | Length (Å) |  |
| PBE0/def2-TZVP   | C3-N13  | 1.356      | C7-C4   | 1.385      |  |
|                  | N13-N5  | 1.321      | C11-H12 | 1.077      |  |
|                  | N5-N10  | 1.305      | N13-H14 | 1.009      |  |
|                  | N10-C11 | 1.346      | N15-H16 | 1.009      |  |
|                  | C11-C3  | 1.385      | C7-H8   | 1.077      |  |
|                  | C4-N15  | 1.356      | C3-N1   | 1.374      |  |
|                  | N15-N6  | 1.321      | N2-C4   | 1.374      |  |
|                  | N6-N9   | 1.305      | N1-N2   | 1.257      |  |
|                  | N9-C7   | 1.346      |         |            |  |
| <b>D1</b>        | Bond    | Length     | Bond    | Length     |  |
| PBE0/6-31G(d)    | Bond    | Length (Å) | Bond    | Length (Å) |  |



|                  |             |                   |             |                   |
|------------------|-------------|-------------------|-------------|-------------------|
|                  | N10-C13     | 1.345             | C11-H12     | 1.079             |
|                  | C13-N6      | 1.313             | N9-H4       | 1.007             |
|                  | N6-N5       | 1.350             | C13-H14     | 1.079             |
|                  | N5-C16      | 1.314             | N10-H1      | 1.007             |
|                  | C15-N9      | 1.361             | C16-N2      | 1.378             |
|                  | N9-C11      | 1.345             | C15-N3      | 1.378             |
|                  | C11-N8      | 1.313             | N2-N3       | 1.248             |
|                  | N8-N7       | 1.350             |             |                   |
| <b>D1</b>        | <b>Bond</b> | <b>Length (Å)</b> | <b>Bond</b> | <b>Length (Å)</b> |
|                  | C16-N10     | 1.366             | N7-C15      | 1.320             |
|                  | N10-C13     | 1.349             | C11-H12     | 1.081             |
|                  | C13-N6      | 1.318             | N9-H4       | 1.010             |
|                  | N6-N5       | 1.354             | C13-H14     | 1.081             |
| PBE0/6-31G(d,p)  | N5-C16      | 1.320             | N10-H1      | 1.010             |
|                  | C15-N9      | 1.366             | C16-N2      | 1.381             |
|                  | N9-C11      | 1.349             | C15-N3      | 1.381             |
|                  | C11-N8      | 1.318             | N2-N3       | 1.258             |
|                  | N8-N7       | 1.354             |             |                   |
| <b>D1</b>        | <b>Bond</b> | <b>Length (Å)</b> | <b>Bond</b> | <b>Length (Å)</b> |
|                  | C16-N10     | 1.365             | N7-C15      | 1.320             |
|                  | N10-C13     | 1.349             | C11-H12     | 1.080             |
|                  | C13-N6      | 1.318             | N9-H4       | 1.008             |
|                  | N6-N5       | 1.354             | C13-H14     | 1.080             |
| PBE0/6-311G(d,p) | N5-C16      | 1.320             | N10-H1      | 1.008             |
|                  | C15-N9      | 1.365             | C16-N2      | 1.381             |
|                  | N9-C11      | 1.349             | C15-N3      | 1.381             |
|                  | C11-N8      | 1.318             | N2-N3       | 1.258             |
|                  | N8-N7       | 1.354             |             |                   |
| <b>D1</b>        | <b>Bond</b> | <b>Length (Å)</b> | <b>Bond</b> | <b>Length (Å)</b> |
|                  | C16-N10     | 1.364             | N7-C15      | 1.315             |
|                  | N10-C13     | 1.348             | C11-H12     | 1.079             |
|                  | C13-N6      | 1.315             | N9-H4       | 1.008             |
|                  | N6-N5       | 1.352             | C13-H14     | 1.079             |
| PBE0/def2-TZVP   | N5-C16      | 1.315             | N10-H1      | 1.008             |
|                  | C15-N9      | 1.364             | C16-N2      | 1.379             |
|                  | N9-C11      | 1.348             | C15-N3      | 1.379             |
|                  | C11-N8      | 1.315             | N2-N3       | 1.252             |
|                  | N8-N7       | 1.352             |             |                   |
| <b>E1</b>        | <b>Bond</b> | <b>Length (Å)</b> | <b>Bond</b> | <b>Length (Å)</b> |
|                  | N6-N16      | 1.324             | N9-N2       | 1.324             |
|                  | N16-C7      | 1.317             | C13-H14     | 1.079             |
| PBE0/6-31G(d)    | C7-C13      | 1.408             | C7-H8       | 1.078             |
|                  | C13-N10     | 1.318             | C11-H12     | 1.079             |
|                  | N10-N6      | 1.324             | C1-H3       | 1.078             |

|                  |             |                   |             |                   |
|------------------|-------------|-------------------|-------------|-------------------|
|                  | N2-N15      | 1.324             | N4-N2       | 1.355             |
|                  | N15-C1      | 1.317             | N5-N6       | 1.355             |
|                  | C1-C11      | 1.408             | N4-N5       | 1.233             |
|                  | C11-N9      | 1.318             |             |                   |
| <b>E1</b>        | <b>Bond</b> | <b>Length (Å)</b> | <b>Bond</b> | <b>Length (Å)</b> |
| PBE0/6-31G(d,p)  | N6-N16      | 1.330             | N9-N2       | 1.331             |
|                  | N16-C7      | 1.321             | C13-H14     | 1.081             |
|                  | C7-C13      | 1.412             | C7-H8       | 1.080             |
|                  | C13-N10     | 1.322             | C11-H12     | 1.081             |
|                  | N10-N6      | 1.331             | C1-H3       | 1.080             |
|                  | N2-N15      | 1.330             | N4-N2       | 1.360             |
|                  | N15-C1      | 1.321             | N5-N6       | 1.360             |
|                  | C1-C11      | 1.412             | N4-N5       | 1.242             |
|                  | C11-N9      | 1.322             |             |                   |
| <b>E1</b>        | <b>Bond</b> | <b>Length (Å)</b> | <b>Bond</b> | <b>Length (Å)</b> |
| PBE0/6-311G(d,p) | N6-N16      | 1.330             | N9-N2       | 1.331             |
|                  | N16-C7      | 1.321             | C13-H14     | 1.080             |
|                  | C7-C13      | 1.412             | C7-H8       | 1.080             |
|                  | C13-N10     | 1.323             | C11-H12     | 1.080             |
|                  | N10-N6      | 1.331             | C1-H3       | 1.080             |
|                  | N2-N15      | 1.330             | N4-N2       | 1.360             |
|                  | N15-C1      | 1.321             | N5-N6       | 1.360             |
|                  | C1-C11      | 1.412             | N4-N5       | 1.242             |
|                  | C11-N9      | 1.323             |             |                   |
| <b>E1</b>        | <b>Bond</b> | <b>Length (Å)</b> | <b>Bond</b> | <b>Length (Å)</b> |
| PBE0/def2-TZVP   | N6-N16      | 1.327             | N9-N2       | 1.328             |
|                  | N16-C7      | 1.318             | C13-H14     | 1.079             |
|                  | C7-C13      | 1.411             | C7-H8       | 1.079             |
|                  | C13-N10     | 1.319             | C11-H12     | 1.079             |
|                  | N10-N6      | 1.328             | C1-H3       | 1.079             |
|                  | N2-N15      | 1.327             | N4-N2       | 1.358             |
|                  | N15-C1      | 1.318             | N5-N6       | 1.358             |
|                  | C1-C11      | 1.411             | N4-N5       | 1.236             |
|                  | C11-N9      | 1.319             |             |                   |
| <b>F1</b>        | <b>Bond</b> | <b>Length (Å)</b> | <b>Bond</b> | <b>Length (Å)</b> |
| PBE0/6-31G(d)    | N4-C13      | 1.355             | N5-N1       | 1.344             |
|                  | C13-N16     | 1.303             | C9-H10      | 1.080             |
|                  | N16-C9      | 1.363             | C13-H14     | 1.080             |
|                  | C9-N6       | 1.311             | C7-H8       | 1.079             |
|                  | N6-N4       | 1.344             | C11-H12     | 1.079             |
|                  | N1-C11      | 1.355             | N4-N3       | 1.351             |
|                  | C11-N15     | 1.303             | N1-N2       | 1.351             |
|                  | N15-C7      | 1.363             | N2-N3       | 1.233             |

|                           |         | C7-N5      | 1.311   |            |  |
|---------------------------|---------|------------|---------|------------|--|
| <b>F1</b>                 | Bond    | Length (Å) | Bond    | Length (Å) |  |
| PBE0/6-31G(d,p)           | N4-C13  | 1.360      | N5-N1   | 1.350      |  |
|                           | C13-N16 | 1.307      | C9-H10  | 1.082      |  |
|                           | N16-C9  | 1.367      | C13-H14 | 1.081      |  |
|                           | C9-N6   | 1.316      | C7-H8   | 1.082      |  |
|                           | N6-N4   | 1.350      | C11-H12 | 1.081      |  |
|                           | N1-C11  | 1.360      | N4-N3   | 1.355      |  |
|                           | C11-N15 | 1.307      | N1-N2   | 1.355      |  |
|                           | N15-C7  | 1.367      | N2-N3   | 1.242      |  |
|                           | C7-N5   | 1.316      |         |            |  |
| <b>F1</b>                 | Bond    | Length (Å) | Bond    | Length (Å) |  |
| PBE0/6-311G(d,p)          | N4-C13  | 1.360      | N5-N1   | 1.349      |  |
|                           | C13-N16 | 1.308      | C9-H10  | 1.081      |  |
|                           | N16-C9  | 1.367      | C13-H14 | 1.081      |  |
|                           | C9-N6   | 1.316      | C7-H8   | 1.081      |  |
|                           | N6-N4   | 1.349      | C11-H12 | 1.081      |  |
|                           | N1-C11  | 1.360      | N4-N3   | 1.355      |  |
|                           | C11-N15 | 1.308      | N1-N2   | 1.355      |  |
|                           | N15-C7  | 1.367      | N2-N3   | 1.242      |  |
|                           | C7-N5   | 1.316      |         |            |  |
| <b>F1</b>                 | Bond    | Length (Å) | Bond    | Length (Å) |  |
| PBE0/def2-TZVP            | N4-C13  | 1.359      | N5-N1   | 1.347      |  |
|                           | C13-N16 | 1.305      | C9-H10  | 1.080      |  |
|                           | N16-C9  | 1.366      | C13-H14 | 1.079      |  |
|                           | C9-N6   | 1.313      | C7-H8   | 1.080      |  |
|                           | N6-N4   | 1.347      | C11-H12 | 1.079      |  |
|                           | N1-C11  | 1.359      | N4-N3   | 1.354      |  |
|                           | C11-N15 | 1.305      | N1-N2   | 1.354      |  |
|                           | N15-C7  | 1.366      | N2-N3   | 1.236      |  |
|                           | C7-N5   | 1.313      |         |            |  |
| <b>A1</b>                 | Bond    | Length (Å) | Bond    | Length (Å) |  |
| $\omega$ B97XD/6-31G(d)   | C1-C2   | 1.358      | N8-C9   | 1.356      |  |
|                           | C2-N3   | 1.356      | N3-N6   | 1.364      |  |
|                           | N3-N13  | 1.348      | N7-N8   | 1.364      |  |
|                           | N13-N14 | 1.282      | N6-N7   | 1.227      |  |
|                           | N14-C1  | 1.366      | C1-H4   | 1.076      |  |
|                           | C9-C10  | 1.358      | C2-H5   | 1.075      |  |
|                           | C10-N16 | 1.366      | C9-H11  | 1.075      |  |
|                           | N16-N15 | 1.282      | C10-H12 | 1.076      |  |
|                           | N15-N8  | 1.348      |         |            |  |
| <b>A1</b>                 | Bond    | Length (Å) | Bond    | Length (Å) |  |
| $\omega$ B97XD/6-31G(d,p) | C1-C2   | 1.363      | N8-C9   | 1.361      |  |

|                    |             |                   |             |                   |
|--------------------|-------------|-------------------|-------------|-------------------|
|                    | C2-N3       | 1.361             | N3-N6       | 1.368             |
|                    | N3-N13      | 1.357             | N7-N8       | 1.368             |
|                    | N13-N14     | 1.288             | N6-N7       | 1.238             |
|                    | N14-C1      | 1.371             | C1-H4       | 1.079             |
|                    | C9-C10      | 1.363             | C2-H5       | 1.078             |
|                    | C10-N16     | 1.371             | C9-H11      | 1.078             |
|                    | N16-N15     | 1.288             | C10-H12     | 1.079             |
|                    | N15-N8      | 1.357             |             |                   |
| <b>A1</b>          | <b>Bond</b> | <b>Length (Å)</b> | <b>Bond</b> | <b>Length (Å)</b> |
|                    | C1-C2       | 1.363             | N8-C9       | 1.361             |
|                    | C2-N3       | 1.361             | N3-N6       | 1.368             |
|                    | N3-N13      | 1.356             | N7-N8       | 1.368             |
|                    | N13-N14     | 1.288             | N6-N7       | 1.238             |
| ωB97XD/6-311G(d,p) | N14-C1      | 1.371             | C1-H4       | 1.078             |
|                    | C9-C10      | 1.363             | C2-H5       | 1.077             |
|                    | C10-N16     | 1.371             | C9-H11      | 1.077             |
|                    | N16-N15     | 1.288             | C10-H12     | 1.078             |
|                    | N15-N8      | 1.356             |             |                   |
| <b>A1</b>          | <b>Bond</b> | <b>Length (Å)</b> | <b>Bond</b> | <b>Length (Å)</b> |
|                    | C1-C2       | 1.361             | N8-C9       | 1.360             |
|                    | C2-N3       | 1.360             | N3-N6       | 1.366             |
|                    | N3-N13      | 1.353             | N7-N8       | 1.366             |
|                    | N13-N14     | 1.283             | N6-N7       | 1.231             |
| ωB97XD/def2-TZVP   | N14-C1      | 1.369             | C1-H4       | 1.077             |
|                    | C9-C10      | 1.361             | C2-H5       | 1.076             |
|                    | C10-N16     | 1.369             | C9-H11      | 1.076             |
|                    | N16-N15     | 1.283             | C10-H12     | 1.077             |
|                    | N15-N8      | 1.353             |             |                   |
| <b>B1</b>          | <b>Bond</b> | <b>Length (Å)</b> | <b>Bond</b> | <b>Length (Å)</b> |
|                    | C1-N2       | 1.369             | N15-C7      | 1.292             |
|                    | N2-C13      | 1.375             | C1-H3       | 1.077             |
|                    | C13-N9      | 1.292             | C13-H14     | 1.076             |
|                    | N9-N16      | 1.383             | C11-H12     | 1.077             |
| ωB97XD/6-31G(d)    | N16-C1      | 1.291             | C7-H8       | 1.076             |
|                    | C7-N6       | 1.369             | N5-N6       | 1.359             |
|                    | N6-C11      | 1.369             | N2-N4       | 1.359             |
|                    | C11-N10     | 1.291             | N4-N5       | 1.231             |
|                    | N10-N15     | 1.383             |             |                   |
| <b>B1</b>          | <b>Bond</b> | <b>Length (Å)</b> | <b>Bond</b> | <b>Length (Å)</b> |
|                    | C1-N2       | 1.373             | N15-C7      | 1.298             |
|                    | N2-C13      | 1.379             | C1-H3       | 1.080             |
| ωB97XD/6-31G(d,p)  | C13-N9      | 1.298             | C13-H14     | 1.078             |
|                    | N9-N16      | 1.388             | C11-H12     | 1.080             |
|                    | N16-C1      | 1.297             | C7-H8       | 1.078             |

|                    |         |            |         |            |
|--------------------|---------|------------|---------|------------|
|                    | C7-N6   | 1.373      | N5-N6   | 1.364      |
|                    | N6-C11  | 1.373      | N2-N4   | 1.364      |
|                    | C11-N10 | 1.297      | N4-N5   | 1.242      |
|                    | N10-N15 | 1.388      |         |            |
| <b>B1</b>          | Bond    | Length (Å) | Bond    | Length (Å) |
| ωB97XD/6-311G(d,p) | C1-N2   | 1.373      | N15-C7  | 1.298      |
|                    | N2-C13  | 1.379      | C1-H3   | 1.079      |
|                    | C13-N9  | 1.298      | C13-H14 | 1.078      |
|                    | N9-N16  | 1.387      | C11-H12 | 1.079      |
|                    | N16-C1  | 1.297      | C7-H8   | 1.078      |
|                    | C7-N6   | 1.379      | N5-N6   | 1.364      |
|                    | N6-C11  | 1.373      | N2-N4   | 1.364      |
|                    | C11-N10 | 1.297      | N4-N5   | 1.241      |
|                    | N10-N15 | 1.387      |         |            |
| <b>B1</b>          | Bond    | Length (Å) | Bond    | Length (Å) |
| ωB97XD/def2-TZVP   | C1-N2   | 1.373      | N15-C7  | 1.294      |
|                    | N2-C13  | 1.379      | C1-H3   | 1.078      |
|                    | C13-N9  | 1.294      | C13-H14 | 1.077      |
|                    | N9-N16  | 1.386      | C11-H12 | 1.078      |
|                    | N16-C1  | 1.292      | C7-H8   | 1.077      |
|                    | C7-N6   | 1.373      | N5-N6   | 1.362      |
|                    | N6-C11  | 1.373      | N2-N4   | 1.362      |
|                    | C11-N10 | 1.292      | N4-N5   | 1.235      |
|                    | N10-N15 | 1.386      |         |            |
| <b>C1</b>          | Bond    | Length (Å) | Bond    | Length (Å) |
| ωB97XD/6-31G(d)    | C3-N13  | 1.351      | C7-C4   | 1.377      |
|                    | N13-N5  | 1.321      | C11-H12 | 1.075      |
|                    | N5-N10  | 1.301      | N13-H14 | 1.007      |
|                    | N10-C11 | 1.348      | N15-H16 | 1.007      |
|                    | C11-C3  | 1.377      | C7-H8   | 1.075      |
|                    | C4-N15  | 1.377      | C3-N1   | 1.383      |
|                    | N15-N6  | 1.321      | N2-C4   | 1.383      |
|                    | N6-N9   | 1.301      | N1-N2   | 1.246      |
|                    | N9-C7   | 1.348      |         |            |
| <b>C1</b>          | Bond    | Length (Å) | Bond    | Length (Å) |
| ωB97XD/6-31G(d,p)  | C3-N13  | 1.356      | C7-C4   | 1.382      |
|                    | N13-N5  | 1.329      | C11-H12 | 1.078      |
|                    | N5-N10  | 1.308      | N13-H14 | 1.010      |
|                    | N10-C11 | 1.352      | N15-H16 | 1.010      |
|                    | C11-C3  | 1.382      | C7-H8   | 1.078      |
|                    | C4-N15  | 1.356      | C3-N1   | 1.386      |
|                    | N15-N6  | 1.329      | N2-C4   | 1.386      |
|                    | N6-N9   | 1.308      | N1-N2   | 1.257      |

|                    | N9-C7   | 1.352      |         |            |
|--------------------|---------|------------|---------|------------|
| <b>C1</b>          | Bond    | Length (Å) | Bond    | Length (Å) |
| ωB97XD/6-311G(d,p) | C3-N13  | 1.356      | C7-C4   | 1.382      |
|                    | N13-N5  | 1.330      | C11-H12 | 1.078      |
|                    | N5-N10  | 1.307      | N13-H14 | 1.009      |
|                    | N10-C11 | 1.352      | N15-H16 | 1.009      |
|                    | C11-C3  | 1.382      | C7-H8   | 1.078      |
|                    | C4-N15  | 1.356      | C3-N1   | 1.386      |
|                    | N15-N6  | 1.330      | N2-C4   | 1.386      |
|                    | N6-N9   | 1.307      | N1-N2   | 1.257      |
|                    | N9-C7   | 1.352      |         |            |
| <b>C1</b>          | Bond    | Length (Å) | Bond    | Length (Å) |
| ωB97XD/def2-TZVP   | C3-N13  | 1.355      | C7-C4   | 1.379      |
|                    | N13-N5  | 1.326      | C11-H12 | 1.076      |
|                    | N5-N10  | 1.303      | N13-H14 | 1.008      |
|                    | N10-C11 | 1.350      | N15-H16 | 1.008      |
|                    | C11-C3  | 1.379      | C7-H8   | 1.076      |
|                    | C4-N15  | 1.355      | C3-N1   | 1.385      |
|                    | N15-N6  | 1.326      | N2-C4   | 1.385      |
|                    | N6-N9   | 1.303      | N1-N2   | 1.251      |
|                    | N9-C7   | 1.350      |         |            |
| <b>D1</b>          | Bond    | Length (Å) | Bond    | Length (Å) |
| ωB97XD/6-31G(d)    | C16-N10 | 1.360      | N7-C15  | 1.307      |
|                    | N10-C13 | 1.349      | C11-H12 | 1.077      |
|                    | C13-N6  | 1.309      | N9-H4   | 1.005      |
|                    | N6-N5   | 1.358      | C13-H14 | 1.077      |
|                    | N5-C16  | 1.307      | N10-H1  | 1.005      |
|                    | C15-N9  | 1.360      | C16-N2  | 1.390      |
|                    | N9-C11  | 1.349      | C15-N3  | 1.390      |
|                    | C11-N8  | 1.309      | N2-N3   | 1.240      |
|                    | N8-N7   | 1.358      |         |            |
| <b>D1</b>          | Bond    | Length (Å) | Bond    | Length (Å) |
| ωB97XD/6-31G(d,p)  | C16-N10 | 1.365      | N7-C15  | 1.315      |
|                    | N10-C13 | 1.353      | C11-H12 | 1.080      |
|                    | C13-N6  | 1.315      | N9-H4   | 1.009      |
|                    | N6-N5   | 1.363      | C13-H14 | 1.080      |
|                    | N5-C16  | 1.315      | N10-H1  | 1.009      |
|                    | C15-N9  | 1.365      | C16-N2  | 1.393      |
|                    | N9-C11  | 1.353      | C15-N3  | 1.393      |
|                    | C11-N8  | 1.315      | N2-N3   | 1.252      |
|                    | N8-N7   | 1.363      |         |            |
| <b>D1</b>          | Bond    | Length (Å) | Bond    | Length (Å) |
| ωB97XD/6-311G(d,p) | C16-N10 | 1.365      | N7-C15  | 1.314      |

|                    |             |                   |             |                   |
|--------------------|-------------|-------------------|-------------|-------------------|
|                    | N10-C13     | 1.353             | C11-H12     | 1.079             |
|                    | C13-N6      | 1.315             | N9-H4       | 1.008             |
|                    | N6-N5       | 1.363             | C13-H14     | 1.079             |
|                    | N5-C16      | 1.314             | N10-H1      | 1.008             |
|                    | C15-N9      | 1.365             | C16-N2      | 1.393             |
|                    | N9-C11      | 1.353             | C15-N3      | 1.393             |
|                    | C11-N8      | 1.315             | N2-N3       | 1.252             |
|                    | N8-N7       | 1.363             |             |                   |
| <b>D1</b>          | <b>Bond</b> | <b>Length (Å)</b> | <b>Bond</b> | <b>Length (Å)</b> |
|                    | C16-N10     | 1.363             | N7-C15      | 1.309             |
|                    | N10-C13     | 1.352             | C11-H12     | 1.078             |
|                    | C13-N6      | 1.311             | N9-H4       | 1.007             |
|                    | N6-N5       | 1.361             | C13-H14     | 1.078             |
| ωB97XD/def2-TZVP   | N5-C16      | 1.309             | N10-H1      | 1.007             |
|                    | C15-N9      | 1.363             | C16-N2      | 1.391             |
|                    | N9-C11      | 1.352             | C15-N3      | 1.391             |
|                    | C11-N8      | 1.311             | N2-N3       | 1.246             |
|                    | N8-N7       | 1.361             |             |                   |
| <b>E1</b>          | <b>Bond</b> | <b>Length (Å)</b> | <b>Bond</b> | <b>Length (Å)</b> |
|                    | N6-N16      | 1.324             | N9-N2       | 1.325             |
|                    | N16-C7      | 1.316             | C13-H14     | 1.077             |
|                    | C7-C13      | 1.408             | C7-H8       | 1.077             |
|                    | C13-N10     | 1.317             | C11-H12     | 1.077             |
| ωB97XD/6-31G(d)    | N10-N6      | 1.325             | C1-H3       | 1.077             |
|                    | N2-N15      | 1.324             | N4-N2       | 1.364             |
|                    | N15-C1      | 1.316             | N5-N6       | 1.364             |
|                    | C1-C11      | 1.408             | N4-N5       | 1.227             |
|                    | C11-N9      | 1.317             |             |                   |
| <b>E1</b>          | <b>Bond</b> | <b>Length (Å)</b> | <b>Bond</b> | <b>Length (Å)</b> |
|                    | N6-N16      | 1.331             | N9-N2       | 1.333             |
|                    | N16-C7      | 1.321             | C13-H14     | 1.080             |
|                    | C7-C13      | 1.412             | C7-H8       | 1.079             |
|                    | C13-N10     | 1.322             | C11-H12     | 1.080             |
| ωB97XD/6-31G(d,p)  | N10-N6      | 1.333             | C1-H3       | 1.079             |
|                    | N2-N15      | 1.331             | N4-N2       | 1.369             |
|                    | N15-C1      | 1.321             | N5-N6       | 1.369             |
|                    | C1-C11      | 1.412             | N4-N5       | 1.238             |
|                    | C11-N9      | 1.322             |             |                   |
| <b>E1</b>          | <b>Bond</b> | <b>Length (Å)</b> | <b>Bond</b> | <b>Length (Å)</b> |
|                    | N6-N16      | 1.331             | N9-N2       | 1.333             |
|                    | N16-C7      | 1.321             | C13-H14     | 1.079             |
| ωB97XD/6-311G(d,p) | C7-C13      | 1.412             | C7-H8       | 1.079             |
|                    | C13-N10     | 1.322             | C11-H12     | 1.079             |
|                    | N10-N6      | 1.333             | C1-H3       | 1.079             |

|                    |             |                   |             |                   |
|--------------------|-------------|-------------------|-------------|-------------------|
|                    | N2-N15      | 1.331             | N4-N2       | 1.369             |
|                    | N15-C1      | 1.321             | N5-N6       | 1.369             |
|                    | C1-C11      | 1.412             | N4-N5       | 1.238             |
|                    | C11-N9      | 1.322             |             |                   |
| <b>E1</b>          | <b>Bond</b> | <b>Length (Å)</b> | <b>Bond</b> | <b>Length (Å)</b> |
| ωB97XD/def2-TZVP   | N6-N16      | 1.328             | N9-N2       | 1.330             |
|                    | N16-C7      | 1.318             | C13-H14     | 1.078             |
|                    | C7-C13      | 1.411             | C7-H8       | 1.078             |
|                    | C13-N10     | 1.319             | C11-H12     | 1.078             |
|                    | N10-N6      | 1.330             | C1-H3       | 1.078             |
|                    | N2-N15      | 1.328             | N4-N2       | 1.367             |
|                    | N15-C1      | 1.318             | N5-N6       | 1.367             |
|                    | C1-C11      | 1.411             | N4-N5       | 1.231             |
|                    | C11-N9      | 1.319             |             |                   |
| <b>F1</b>          | <b>Bond</b> | <b>Length (Å)</b> | <b>Bond</b> | <b>Length (Å)</b> |
| ωB97XD/6-31G(d)    | N4-C13      | 1.353             | N5-N1       | 1.347             |
|                    | C13-N16     | 1.303             | C9-H10      | 1.078             |
|                    | N16-C9      | 1.365             | C13-H14     | 1.078             |
|                    | C9-N6       | 1.309             | C7-H8       | 1.078             |
|                    | N6-N4       | 1.347             | C11-H12     | 1.078             |
|                    | N1-C11      | 1.353             | N4-N3       | 1.359             |
|                    | C11-N15     | 1.303             | N1-N2       | 1.359             |
|                    | N15-C7      | 1.365             | N2-N3       | 1.228             |
|                    | C7-N5       | 1.309             |             |                   |
| <b>F1</b>          | <b>Bond</b> | <b>Length (Å)</b> | <b>Bond</b> | <b>Length (Å)</b> |
| ωB97XD/6-31G(d,p)  | N4-C13      | 1.359             | N5-N1       | 1.354             |
|                    | C13-N16     | 1.308             | C9-H10      | 1.081             |
|                    | N16-C9      | 1.369             | C13-H14     | 1.080             |
|                    | C9-N6       | 1.315             | C7-H8       | 1.081             |
|                    | N6-N4       | 1.354             | C11-H12     | 1.080             |
|                    | N1-C11      | 1.359             | N4-N3       | 1.364             |
|                    | C11-N15     | 1.308             | N1-N2       | 1.364             |
|                    | N15-C7      | 1.369             | N2-N3       | 1.239             |
|                    | C7-N5       | 1.315             |             |                   |
| <b>F1</b>          | <b>Bond</b> | <b>Length (Å)</b> | <b>Bond</b> | <b>Length (Å)</b> |
| ωB97XD/6-311G(d,p) | N4-C13      | 1.359             | N5-N1       | 1.353             |
|                    | C13-N16     | 1.308             | C9-H10      | 1.080             |
|                    | N16-C9      | 1.369             | C13-H14     | 1.080             |
|                    | C9-N6       | 1.315             | C7-H8       | 1.080             |
|                    | N6-N4       | 1.353             | C11-H12     | 1.080             |
|                    | N1-C11      | 1.359             | N4-N3       | 1.364             |
|                    | C11-N15     | 1.308             | N1-N2       | 1.364             |
|                    | N15-C7      | 1.369             | N2-N3       | 1.239             |



|                  |         | C7-N5      | 1.315   |            |  |
|------------------|---------|------------|---------|------------|--|
| <b>F1</b>        | Bond    | Length (Å) | Bond    | Length (Å) |  |
| ωB97XD/def2-TZVP | N4-C13  | 1.358      | N5-N1   | 1.350      |  |
|                  | C13-N16 | 1.304      | C9-H10  | 1.079      |  |
|                  | N16-C9  | 1.368      | C13-H14 | 1.079      |  |
|                  | C9-N6   | 1.311      | C7-H8   | 1.079      |  |
|                  | N6-N4   | 1.350      | C11-H12 | 1.079      |  |
|                  | N1-C11  | 1.358      | N4-N3   | 1.362      |  |
|                  | C11-N15 | 1.304      | N1-N2   | 1.362      |  |
|                  | N15-C7  | 1.368      | N2-N3   | 1.232      |  |
|                  | C7-N5   | 1.311      |         |            |  |

**Table S2.** The various enthalpies of azobis-triazole derivatives.

| No.             | $\Delta H_1^a$<br>(kJ/mol) | $\Delta H_2^b$<br>(kJ/mol) | $\Delta H_f^c$ (solid)<br>(kJ/mol) | $\Delta H_f^c$ (solid)<br>(kJ/g) | No.             | $\Delta H_1^a$<br>(kJ/mol) | $\Delta H_2^b$<br>(kJ/mol) | $\Delta H_f^c$ (solid)<br>(kJ/mol) | $\Delta H_f^c$ (solid)<br>(kJ/g) |
|-----------------|----------------------------|----------------------------|------------------------------------|----------------------------------|-----------------|----------------------------|----------------------------|------------------------------------|----------------------------------|
| <b>A1</b>       | 56.60                      | 1045.07                    | 988.47                             | 6.02                             | <b>B1</b>       | 58.95                      | 956.98                     | 898.03                             | 5.47                             |
| <b>A2</b>       | 37.41                      | 1394.00                    | 1356.59                            | 2.94                             | <b>B2</b>       | 49.36                      | 1340.64                    | 1291.28                            | 2.79                             |
| <b>A3</b>       | 45.83                      | 1118.03                    | 1072.2                             | 4.03                             | <b>B3</b>       | 61.39                      | 1071.25                    | 1009.86                            | 3.79                             |
| <b>A4</b>       | 50.61                      | 1240.75                    | 1190.14                            | 4.19                             | <b>B4</b>       | 58.73                      | 1166.37                    | 1107.64                            | 3.90                             |
| <b>A5</b>       | 54.57                      | 1153.07                    | 1098.5                             | 4.32                             | <b>B5</b>       | 54.06                      | 1122.11                    | 1068.05                            | 4.20                             |
| <b>A6</b>       | 46.54                      | 1042.42                    | 995.88                             | 3.48                             | <b>B6</b>       | 64.03                      | 960.36                     | 896.33                             | 3.13                             |
| <b>A1-NO(1)</b> | 59.99                      | 1066.01                    | 1006.01                            | 5.58                             | <b>B1-NO(1)</b> | 64.52                      | 966.07                     | 901.55                             | 5.01                             |
| <b>A2-NO(1)</b> | 39.76                      | 1418.33                    | 1378.57                            | 2.88                             | <b>B2-NO(1)</b> | 45.27                      | 1355.49                    | 1310.22                            | 2.74                             |
| <b>A3-NO(1)</b> | 49.21                      | 1140.86                    | 1091.65                            | 3.87                             | <b>B3-NO(1)</b> | 62.91                      | 1083.84                    | 1020.93                            | 3.62                             |
| <b>A4-NO(1)</b> | 52.29                      | 1262.79                    | 1210.5                             | 4.03                             | <b>B4-NO(1)</b> | 60.36                      | 1177.14                    | 1116.78                            | 3.72                             |
| <b>A5-NO(1)</b> | 56.71                      | 1176.04                    | 1119.33                            | 4.14                             | <b>B5-NO(1)</b> | 53.42                      | 1134.02                    | 1080.6                             | 4.00                             |
| <b>A6-NO(1)</b> | 49.26                      | 1064.19                    | 1014.93                            | 3.36                             | <b>B6-NO(1)</b> | 63.68                      | 974.29                     | 910.61                             | 3.01                             |
| <b>A1-NO(2)</b> | 65.01                      | 1057.39                    | 992.38                             | 5.06                             | <b>B1-NO(2)</b> | 66.64                      | 980.81                     | 914.16                             | 4.66                             |
| <b>A2-NO(2)</b> | 49.48                      | 1424.56                    | 1375.08                            | 2.78                             | <b>B2-NO(2)</b> | 55.37                      | 1393.44                    | 1338.08                            | 2.71                             |
| <b>A3-NO(2)</b> | 63.98                      | 1165.24                    | 1101.26                            | 3.69                             | <b>B3-NO(2)</b> | 69.75                      | 1119.98                    | 1050.23                            | 3.52                             |

|                 |       |         |         |      |                 |        |         |         |      |
|-----------------|-------|---------|---------|------|-----------------|--------|---------|---------|------|
| <b>A4-NO(2)</b> | 54.12 | 1262.21 | 1208.09 | 3.82 | <b>B4-NO(2)</b> | 65.55  | 1208.68 | 1143.13 | 3.62 |
| <b>A5-NO(2)</b> | 59.55 | 1221.00 | 1161.44 | 4.06 | <b>B5-NO(2)</b> | 119.21 | 1172.95 | 1053.73 | 3.68 |
| <b>A6-NO(2)</b> | 62.29 | 1066.89 | 1004.60 | 3.16 | <b>B6-NO(2)</b> | 72.79  | 991.95  | 919.15  | 2.89 |
| <b>C1</b>       | 67.26 | 894.50  | 827.24  | 5.04 | <b>D1</b>       | 78.12  | 804.07  | 725.95  | 4.42 |
| <b>C2</b>       | 42.65 | 1233.01 | 1190.36 | 2.58 | <b>D2</b>       | 49.28  | 1169.96 | 1120.68 | 2.42 |
| <b>C3</b>       | 58.63 | 978.21  | 919.58  | 3.46 | <b>D3</b>       | 66.64  | 896.31  | 829.67  | 3.12 |
| <b>C4</b>       | 53.86 | 1089.82 | 1035.96 | 3.65 | <b>D4</b>       | 67.39  | 991.17  | 923.78  | 3.25 |
| <b>C5</b>       | 57.61 | 1028.56 | 970.95  | 3.82 | <b>D5</b>       | 57.69  | 920.11  | 862.42  | 3.39 |
| <b>C6</b>       | 56.79 | 883.27  | 826.48  | 2.89 | <b>D6</b>       | 70.08  | 799.50  | 729.42  | 2.55 |
| <b>C1-NO(1)</b> | 69.54 | 841.58  | 772.03  | 4.29 | <b>D1-NO(1)</b> | 80.78  | 763.59  | 682.81  | 3.79 |
| <b>C2-NO(1)</b> | 44.42 | 1198.82 | 1154.4  | 2.41 | <b>D2-NO(2)</b> | 53.53  | 1132.36 | 1078.83 | 2.26 |
| <b>C3-NO(1)</b> | 58.63 | 949.45  | 890.82  | 3.16 | <b>D3-NO(2)</b> | 69.73  | 858.16  | 788.43  | 2.79 |
| <b>C4-NO(1)</b> | 53.85 | 1048.48 | 994.63  | 3.31 | <b>D4-NO(2)</b> | 64.96  | 952.65  | 887.69  | 2.96 |
| <b>C5-NO(1)</b> | 60.51 | 986.37  | 925.86  | 3.43 | <b>D5-NO(2)</b> | 61.17  | 883.03  | 821.86  | 3.04 |
| <b>C6-NO(1)</b> | 56.88 | 850.64  | 793.76  | 2.63 | <b>D6-NO(2)</b> | 72.80  | 760.16  | 687.36  | 2.28 |
| <b>C1-NO(2)</b> | 78.01 | 932.66  | 854.65  | 4.36 | <b>D1-NO(2)</b> | 85.73  | 836.47  | 750.74  | 3.83 |
| <b>C2-NO(2)</b> | 57.89 | 1307.70 | 1249.81 | 2.53 | <b>D2-NO(2)</b> | 58.73  | 1196.78 | 1138.05 | 2.30 |
| <b>C3-NO(2)</b> | 75.81 | 1048.46 | 972.65  | 3.26 | <b>D3-NO(2)</b> | 77.09  | 942.92  | 865.83  | 2.90 |

|                 |       |         |         |      |                 |       |         |         |      |
|-----------------|-------|---------|---------|------|-----------------|-------|---------|---------|------|
| <b>C4-NO(2)</b> | 66.58 | 1133.10 | 1066.52 | 3.37 | <b>D4-NO(2)</b> | 70.62 | 1029.08 | 958.46  | 3.03 |
| <b>C5-NO(2)</b> | 69.25 | 1109.94 | 1040.69 | 3.64 | <b>D5-NO(2)</b> | 63.86 | 971.30  | 907.45  | 3.17 |
| <b>C6-NO(2)</b> | 78.97 | 943.49  | 864.52  | 2.72 | <b>D6-NO(2)</b> | 79.89 | 817.39  | 737.49  | 2.32 |
| <b>E1</b>       | 58.39 | 1010.36 | 951.97  | 5.80 | <b>F1</b>       | 52.72 | 889.84  | 837.12  | 5.10 |
| <b>E2</b>       | 36.49 | 1371.24 | 1334.75 | 2.89 | <b>F2</b>       | 36.23 | 1279.03 | 1242.79 | 2.69 |
| <b>E3</b>       | 43.51 | 1088.13 | 1044.61 | 3.93 | <b>F3</b>       | 45.25 | 1005.10 | 959.85  | 3.61 |
| <b>E4</b>       | 52.13 | 1212.64 | 1160.51 | 4.08 | <b>F4</b>       | 53.48 | 1107.72 | 1054.24 | 3.71 |
| <b>E5</b>       | 48.98 | 1123.56 | 1074.58 | 4.23 | <b>F5</b>       | 47.86 | 1064.51 | 1016.65 | 4.00 |
| <b>E6</b>       | 45.87 | 1011.32 | 965.45  | 3.37 | <b>F6</b>       | 44.30 | 891.89  | 847.59  | 2.96 |
| <b>E1-NO(1)</b> | 56.43 | 1039.50 | 983.07  | 5.46 | <b>F1-NO(1)</b> | 54.56 | 919.32  | 864.76  | 4.80 |
| <b>E2-NO(1)</b> | 36.49 | 1371.24 | 1334.75 | 2.79 | <b>F2-NO(2)</b> | 38.13 | 1310.86 | 1272.73 | 2.66 |
| <b>E3-NO(1)</b> | 42.45 | 1122.69 | 1080.25 | 3.83 | <b>F3-NO(2)</b> | 46.64 | 1038.99 | 992.34  | 3.52 |
| <b>E4-NO(1)</b> | 51.85 | 1245.03 | 1193.18 | 3.98 | <b>F4-NO(2)</b> | 55.10 | 1137.29 | 1082.20 | 3.61 |
| <b>E5-NO(1)</b> | 51.53 | 1153.82 | 1102.29 | 4.08 | <b>F5-NO(2)</b> | 48.96 | 1082.05 | 1033.09 | 3.82 |
| <b>E6-NO(1)</b> | 46.02 | 1042.14 | 996.12  | 3.30 | <b>F6-NO(2)</b> | 46.07 | 926.23  | 880.17  | 2.91 |
| <b>E1-NO(2)</b> | 62.54 | 1103.04 | 1040.50 | 5.31 | <b>F1-NO(2)</b> | 64.07 | 1006.91 | 942.84  | 4.81 |
| <b>E2-NO(2)</b> | 41.84 | 1465.68 | 1423.83 | 2.88 | <b>F2-NO(2)</b> | 50.64 | 1411.02 | 1360.38 | 2.75 |
| <b>E3-NO(2)</b> | 54.33 | 1203.01 | 1148.68 | 3.85 | <b>F3-NO(2)</b> | 62.70 | 1140.91 | 1078.21 | 3.62 |

|                 |       |         |         |      |                 |       |         |         |      |
|-----------------|-------|---------|---------|------|-----------------|-------|---------|---------|------|
| <b>E4-NO(2)</b> | 53.15 | 1321.14 | 1267.99 | 4.01 | <b>F4-NO(2)</b> | 59.04 | 1222.11 | 1163.07 | 3.68 |
| <b>E5-NO(2)</b> | 51.57 | 1246.61 | 1195.04 | 4.18 | <b>F5-NO(2)</b> | 58.39 | 1207.05 | 1148.65 | 4.01 |
| <b>E6-NO(2)</b> | 56.39 | 1112.36 | 1055.97 | 3.32 | <b>F6-NO(2)</b> | 62.38 | 1009.27 | 946.89  | 2.98 |

---

<sup>a</sup>  $\Delta H_1$ , the enthalpy of sublimation; <sup>b</sup>  $\Delta H_2$ , the enthalpy of gas-phase formation; <sup>c</sup>  $\Delta H_f$ , the enthalpy of solid formation

**Table S3.** Calculation results of detonation velocity ( $V_D$  (m/s)), detonation pressure ( $P$  (GPa)), detonation heat ( $Q$  (kJ/kg)), oxygen balance ( $\Omega$  (%)) of azobis-triazole and its derivatives with different azo linkages.

| No.             | $\Omega^a$ | $V_D^b$ | $P^c$ | $Q^d$ | No.             | $\Omega^a$ | $V_D^b$  | $P^c$ | $Q^d$ |
|-----------------|------------|---------|-------|-------|-----------------|------------|----------|-------|-------|
| <b>A1</b>       | -97.47     | 7937.6  | 22.14 | 5774  | <b>B1</b>       | -97.47     | 7848.9   | 21.53 | 5251  |
| <b>A2</b>       | -3.46      | 9445.8  | 39.62 | 7777  | <b>B2</b>       | -3.46      | 9662.8   | 42.32 | 7706  |
| <b>A3</b>       | -42.08     | 8385.0  | 29.95 | 7477  | <b>B3</b>       | -42.08     | 8679.9   | 33.03 | 7271  |
| <b>A4</b>       | -33.78     | 9008.3  | 34.15 | 6697  | <b>B4</b>       | -33.78     | 9094.1   | 35.11 | 6452  |
| <b>A5</b>       | -31.48     | 9147.3  | 36.16 | 6929  | <b>B5</b>       | -31.48     | 9145.6   | 36.43 | 6827  |
| <b>A6</b>       | -16.77     | 9345.0  | 38.77 | 7114  | <b>B6</b>       | -16.77     | 9577.3   | 41.47 | 6895  |
| <b>A1-NO(1)</b> | -79.94     | 8303.51 | 26.23 | 6414  | <b>B1-NO(1)</b> | -79.94     | 8293.20  | 25.90 | 5882  |
| <b>A2-NO(1)</b> | 0          | 9504.6  | 40.52 | 7805  | <b>B2-NO(1)</b> | 0          | 9684.1   | 42.64 | 7731  |
| <b>A3-NO(1)</b> | -34.02     | 8882.3  | 36.34 | 7674  | <b>B3-NO(1)</b> | -34.02     | 9160.6   | 40.10 | 7479  |
| <b>A4-NO(1)</b> | -26.65     | 9281.9  | 37.64 | 7039  | <b>B4-NO(1)</b> | -26.65     | 9412.2   | 39.11 | 6784  |
| <b>A5-NO(1)</b> | -23.69     | 9488.5  | 40.50 | 7315  | <b>B5-NO(1)</b> | -23.69     | 9432.4   | 39.84 | 7179  |
| <b>A6-NO(1)</b> | -10.59     | 9512.6  | 39.94 | 7594  | <b>B6-NO(1)</b> | -10.59     | 9824.4   | 43.60 | 7280  |
| <b>A1-NO(2)</b> | -65.26     | 8669.16 | 30.37 | 6801  | <b>B1-NO(2)</b> | -65.26     | 8602.37  | 29.67 | 6432  |
| <b>A2-NO(2)</b> | 3.24       | 9702.61 | 42.91 | 7715  | <b>B2-NO(2)</b> | 3.24       | 9859.34  | 44.91 | 7679  |
| <b>A3-NO(2)</b> | -26.83     | 9403.51 | 44.80 | 7922  | <b>B3-NO(2)</b> | -26.83     | 9494.2   | 46.39 | 7784  |
| <b>A4-NO(2)</b> | -20.24     | 9503.8  | 40.49 | 7283  | <b>B4-NO(2)</b> | -20.24     | 9668.87  | 42.36 | 7132  |
| <b>A5-NO(2)</b> | -16.77     | 9816.86 | 44.59 | 7742  | <b>B5-NO(2)</b> | -16.77     | 9753.88  | 43.72 | 7407  |
| <b>A6-NO(2)</b> | -5.03      | 9818.91 | 44.37 | 7949  | <b>B6-NO(2)</b> | -5.03      | 10032.55 | 47.09 | 7741  |
| <b>C1</b>       | -97.47     | 7965.2  | 22.36 | 4841  | <b>D1</b>       | -97.47     | 8177.4   | 23.73 | 4240  |
| <b>C2</b>       | -3.46      | 9594.0  | 41.63 | 7515  | <b>D2</b>       | -3.46      | 9545.4   | 41.03 | 7382  |
| <b>C3</b>       | -42.08     | 8604.0  | 32.23 | 6945  | <b>D3</b>       | -42.08     | 8676.5   | 32.92 | 6623  |
| <b>C4</b>       | -33.78     | 8982.6  | 33.81 | 6208  | <b>D4</b>       | -33.78     | 9293.9   | 36.94 | 5883  |
| <b>C5</b>       | -31.48     | 9121.2  | 35.98 | 6490  | <b>D5</b>       | -31.48     | 8966.0   | 34.34 | 6088  |
| <b>C6</b>       | -16.77     | 9446.3  | 40.06 | 6656  | <b>D6</b>       | -16.77     | 9542.8   | 41.03 | 6389  |
| <b>C1-NO(1)</b> | -79.94     | 8242.89 | 25.31 | 5203  | <b>D1-NO(1)</b> | -79.94     | 8515.91  | 27.11 | 4739  |
| <b>C2-NO(1)</b> | 0          | 9678.5  | 42.34 | 7473  | <b>D2-NO(1)</b> | 0          | 9651.6   | 42.36 | 7341  |

|                 |        |          |       |      |                 |        |          |       |      |
|-----------------|--------|----------|-------|------|-----------------|--------|----------|-------|------|
| <b>C3-NO(1)</b> | -34.02 | 8976.0   | 38.08 | 7034 | <b>D3-NO(1)</b> | -34.02 | 9077.6   | 39.60 | 6704 |
| <b>C4-NO(1)</b> | -26.65 | 9219.1   | 36.86 | 6388 | <b>D4-NO(1)</b> | -26.65 | 9141.1   | 36.04 | 6057 |
| <b>C5-NO(1)</b> | -23.69 | 9447.8   | 39.74 | 6693 | <b>D5-NO(1)</b> | -23.69 | 9302.8   | 38.08 | 6330 |
| <b>C6-NO(1)</b> | -10.59 | 9657.8   | 41.61 | 6897 | <b>D6-NO(1)</b> | -10.59 | 9831.9   | 44.72 | 6608 |
| <b>C1-NO(2)</b> | -65.26 | 8871.13  | 31.61 | 6183 | <b>D1-NO(2)</b> | -65.26 | 9047.687 | 33.06 | 5698 |
| <b>C2-NO(2)</b> | 3.24   | 9979.39  | 46.38 | 7548 | <b>D2-NO(2)</b> | 3.24   | 9830.34  | 44.39 | 7343 |
| <b>C3-NO(2)</b> | -26.83 | 9583.566 | 47.99 | 7557 | <b>D3-NO(2)</b> | -26.83 | 9508.381 | 46.61 | 7217 |
| <b>C4-NO(2)</b> | -20.24 | 9704.322 | 42.53 | 6920 | <b>D4-NO(2)</b> | -20.24 | 9681.209 | 42.26 | 6608 |
| <b>C5-NO(2)</b> | -16.77 | 9970.53  | 46.33 | 7423 | <b>D5-NO(2)</b> | -16.77 | 9692.069 | 42.94 | 6957 |
| <b>C6-NO(2)</b> | -5.03  | 10275.33 | 50.32 | 7607 | <b>D6-NO(2)</b> | -5.03  | 10172.55 | 48.73 | 7228 |
| <b>E1</b>       | -97.47 | 7879.2   | 21.80 | 5563 | <b>F1</b>       | -97.47 | 7559.4   | 19.62 | 4891 |
| <b>E2</b>       | -3.46  | 9431.6   | 39.63 | 7737 | <b>F2</b>       | -3.46  | 9447.0   | 39.73 | 7582 |
| <b>E3</b>       | -42.08 | 8349.4   | 29.62 | 7382 | <b>F3</b>       | -42.08 | 9594.3   | 40.78 | 8225 |
| <b>E4</b>       | -33.78 | 9012.6   | 34.30 | 6606 | <b>F4</b>       | -33.78 | 8947.0   | 33.60 | 6261 |
| <b>E5</b>       | -31.48 | 9036.9   | 35.09 | 6821 | <b>F5</b>       | -31.48 | 8984.6   | 34.70 | 6615 |
| <b>E6</b>       | -16.77 | 9314.1   | 38.52 | 7019 | <b>F6</b>       | -16.77 | 9202.9   | 37.37 | 6649 |
| <b>E1-NO(1)</b> | -79.94 | 8186.5   | 25.25 | 6284 | <b>F1-NO(1)</b> | -79.94 | 7985.0   | 23.65 | 5664 |
| <b>E2-NO(1)</b> | 0      | 9467.3   | 39.92 | 7776 | <b>F2-NO(1)</b> | 0      | 9554.3   | 41.02 | 7645 |
| <b>E3-NO(1)</b> | -34.02 | 8777.3   | 35.01 | 7623 | <b>F3-NO(1)</b> | -34.02 | 9810.8   | 46.12 | 8474 |
| <b>E4-NO(1)</b> | -26.65 | 9259.5   | 37.43 | 6984 | <b>F4-NO(1)</b> | -26.65 | 9273.4   | 37.48 | 6658 |
| <b>E5-NO(1)</b> | -23.69 | 9381.7   | 39.13 | 7231 | <b>F5-NO(1)</b> | -23.69 | 9339.3   | 38.68 | 7005 |
| <b>E6-NO(1)</b> | -10.59 | 9448.5   | 39.18 | 7531 | <b>F6-NO(1)</b> | -10.59 | 9429.9   | 39.13 | 7164 |
| <b>E1-NO(2)</b> | -65.26 | 8698.9   | 30.61 | 7024 | <b>F1-NO(2)</b> | -65.26 | 8590.4   | 29.40 | 6561 |
| <b>E2-NO(2)</b> | 3.24   | 9594.2   | 41.62 | 7773 | <b>F2-NO(2)</b> | 3.24   | 9761.9   | 43.70 | 7700 |
| <b>E3-NO(2)</b> | -26.83 | 9277.9   | 42.61 | 8038 | <b>F3-NO(2)</b> | -26.83 | 10173.2  | 54.05 | 8926 |
| <b>E4-NO(2)</b> | -20.24 | 9519.9   | 40.94 | 7454 | <b>F4-NO(2)</b> | -20.24 | 9544.5   | 40.97 | 7166 |
| <b>E5-NO(2)</b> | -16.77 | 9721.9   | 43.36 | 7810 | <b>F5-NO(2)</b> | -16.77 | 9816.9   | 44.40 | 7703 |
| <b>E6-NO(2)</b> | -5.03  | 9714.4   | 42.83 | 8068 | <b>F6-NO(2)</b> | -5.03  | 9778.3   | 43.64 | 7788 |

<sup>a</sup>  $\Omega$ , oxygen balance; <sup>b</sup>  $V_D$ , detonation velocity; <sup>c</sup>  $P$ , detonation pressure; <sup>d</sup>  $Q$ , detonation heat.

**Table S4.** Calculation results of the bond dissociation enthalpy (BDE(C-R) without *N*-Oxides, R = C(NO<sub>2</sub>)<sub>3</sub>, NF<sub>2</sub>, NHNO<sub>2</sub>, NO<sub>2</sub>, ONO<sub>2</sub>) and Mayer bond order (MBO) of azobis-triazole derivatives.

| No. | $E_A$ (Hartree) | $E_{B\cdot}$ (Hartree) | $E_{AB}$ (Hartree) | BDE(C-R) (kJ/mol) | MBO   |
|-----|-----------------|------------------------|--------------------|-------------------|-------|
| A2  | -1244.4683      | -653.2228              | -1897.8707         | 471.35            | 0.913 |
| A3  | -845.4578       | -254.2729              | -1099.8503         | 313.88            | 0.813 |
| A4  | -851.5620       | -260.3186              | -1112.0594         | 469.32            | 0.909 |
| A5  | -796.2390       | -205.0583              | -1001.4120         | 301.08            | 0.754 |
| A6  | -871.4203       | -280.1911              | -1151.7759         | 431.82            | 0.980 |
| B2  | -1244.4966      | -653.2228              | -1897.8909         | 450.44            | 0.891 |
| B3  | -845.4847       | -254.2729              | -1099.8681         | 290.22            | 0.834 |
| B4  | -851.5941       | -260.3186              | -1112.0877         | 459.53            | 0.945 |
| B5  | -796.2622       | -205.0583              | -1001.4238         | 270.98            | 0.730 |
| B6  | -871.4539       | -280.1911              | -1151.8071         | 425.66            | 0.768 |
| C2  | -1244.5295      | -653.2228              | -1897.9319         | 471.73            | 0.905 |
| C3  | -845.5137       | -254.2729              | -1099.9035         | 307.10            | 0.826 |
| C4  | -851.6199       | -260.3186              | -1112.1169         | 468.44            | 0.923 |
| C5  | -796.2919       | -205.0583              | -1001.4594         | 286.50            | 0.747 |
| C6  | -871.4801       | -280.1911              | -1151.8365         | 434.03            | 0.875 |
| D2  | -1244.5583      | -653.2228              | -1897.9559         | 459.03            | 0.903 |
| D3  | -845.5475       | -254.2729              | -1099.9347         | 300.30            | 0.838 |
| D4  | -851.6571       | -260.3186              | -1112.1545         | 469.40            | 0.912 |
| D5  | -796.3307       | -205.0583              | -1001.5007         | 293.18            | 0.739 |
| D6  | -871.5139       | -280.1911              | -1151.8684         | 429.12            | 0.872 |
| E2  | -1244.4808      | -653.2228              | -1897.8793         | 461.20            | 0.890 |
| E3  | -845.4721       | -254.2729              | -1099.8617         | 306.35            | 0.843 |
| E4  | -851.5750       | -260.3186              | -1112.0701         | 463.34            | 0.898 |
| E5  | -796.2523       | -205.0583              | -1001.4232         | 295.48            | 0.734 |
| E6  | -871.4340       | -280.1911              | -1151.7877         | 427.10            | 0.817 |
| F2  | -1244.5214      | -653.2228              | -1897.9144         | 446.98            | 0.871 |
| F3  | -845.5099       | -254.2729              | -1099.8933         | 290.05            | 0.817 |
| F4  | -851.6179       | -260.3186              | -1112.1101         | 455.54            | 0.938 |
| F5  | -796.2864       | -205.0583              | -1001.4457         | 265.15            | 0.709 |
| F6  | -871.4795       | -280.1911              | -1151.8332         | 426.99            | 1.023 |



**Table S5.** Calculation results of the bond dissociation enthalpy (BDE(N=N) without *N*-Oxides) and Mayer bond order (MBO) of azobis-triazole derivatives.

| No. | $E_A$ (Hartree) | $E_{B\cdot}$ (Hartree) | $E_{AB}$ (Hartree) | BDE (N=N) (kJ/mol) | MBO   |
|-----|-----------------|------------------------|--------------------|--------------------|-------|
| A1  | -296.1420       | -296.1420              | -592.4428          | 416.64             | 1.750 |
| A2  | -948.8547       | -948.8547              | -1897.8706         | 423.01             | 1.665 |
| A3  | -549.8449       | -549.8449              | -1099.8503         | 421.49             | 1.666 |
| A4  | -555.9502       | -555.9502              | -1112.0594         | 417.40             | 1.659 |
| A5  | -500.6258       | -500.6258              | -1001.4120         | 420.98             | 1.667 |
| A6  | -575.8078       | -575.8078              | -1151.7759         | 420.49             | 1.665 |
| B1  | -296.1580       | -296.1580              | -592.47632         | 420.73             | 1.741 |
| B2  | -948.8632       | -948.8632              | -1897.8909         | 432.15             | 1.729 |
| B3  | -549.8539       | -549.8539              | -1099.8681         | 420.91             | 1.650 |
| B4  | -555.9624       | -555.9624              | -1112.0877         | 427.81             | 1.681 |
| B5  | -500.6341       | -500.6341              | -1001.4238         | 408.48             | 1.669 |
| B6  | -575.8229       | -575.8229              | -1151.8071         | 423.34             | 1.667 |
| C1  | -296.1724       | -296.1724              | -592.5001          | 407.53             | 1.617 |
| C2  | -948.8814       | -948.8814              | -1897.9319         | 444.20             | 1.591 |
| C3  | -549.8739       | -549.8739              | -1099.9035         | 408.72             | 1.554 |
| C4  | -555.9785       | -555.9785              | -1112.1169         | 419.68             | 1.571 |
| C5  | -500.6530       | -500.6530              | -1001.4594         | 402.48             | 1.612 |
| C6  | -575.8386       | -575.8386              | -1151.8365         | 418.38             | 1.557 |
| D1  | -296.1869       | -296.1869              | -592.5346          | 421.84             | 1.657 |
| D2  | -948.8960       | -948.8960              | -1897.9559         | 430.12             | 1.645 |
| D3  | -549.8858       | -549.8858              | -1099.9347         | 428.36             | 1.639 |
| D4  | -555.9984       | -555.9984              | -1112.1545         | 413.90             | 1.625 |
| D5  | -500.6687       | -500.6687              | -1001.5007         | 428.75             | 1.641 |
| D6  | -575.8537       | -575.8537              | -1151.8684         | 422.43             | 1.635 |
| E1  | -296.1479       | -296.1479              | -592.4560          | 420.45             | 1.626 |
| E2  | -948.8583       | -948.8583              | -1897.8793         | 426.83             | 1.639 |
| E3  | -549.8507       | -549.8507              | -1099.8617         | 420.84             | 1.636 |
| E4  | -555.9553       | -555.9553              | -1112.0701         | 418.70             | 1.620 |
| E5  | -500.6307       | -500.6307              | -1001.4232         | 424.76             | 1.636 |
| E6  | -575.8132       | -575.8132              | -1151.7877         | 423.63             | 1.631 |
| F1  | -296.1688       | -296.1688              | -592.5019          | 431.61             | 1.654 |
| F2  | -948.8730       | -948.8730              | -1897.9144         | 441.90             | 1.729 |
| F3  | -549.8659       | -549.8659              | -1099.8933         | 423.83             | 1.659 |
| F4  | -555.9728       | -555.9728              | -1112.1101         | 431.80             | 1.692 |
| F5  | -500.6456       | -500.6456              | -1001.4457         | 405.86             | 1.681 |
| F6  | -575.8344       | -575.8344              | -1151.8332         | 431.59             | 1.688 |

**Table S6.** Calculation results of the bond dissociation enthalpy (BDE(C-R)<sub>1</sub>, BDE(C-R)<sub>2</sub>, and BDE(N=N)<sub>1</sub> with *N*-Oxide, which is located on the azo bond) and Mayer bond order (MBO) of azobis-triazole derivatives.

| BDE(C-R) <sub>1</sub> |                 |                        |                    |                                |       |
|-----------------------|-----------------|------------------------|--------------------|--------------------------------|-------|
| No.                   | $E_A$ (Hartree) | $E_{B\cdot}$ (Hartree) | $E_{AB}$ (Hartree) | BDE(C-R) <sub>1</sub> (kJ/mol) | MBO   |
| <b>A1-NO(1)</b>       | –               | –                      | –                  | –                              | –     |
| <b>A2-NO(1)</b>       | -1319.619754    | -653.2227753           | -1973.022199       | 471.72                         | 0.915 |
| <b>A3-NO(1)</b>       | -920.609939     | -254.2728934           | -1175.002466       | 314.10                         | 0.815 |
| <b>A4-NO(1)</b>       | -926.7144272    | -260.3186097           | -1187.21187        | 469.53                         | 0.914 |
| <b>A5-NO(1)</b>       | -871.3905922    | -205.058329            | -1076.564087       | 302.38                         | 0.754 |
| <b>A6-NO(1)</b>       | -946.5729657    | -280.1910576           | -1226.928438       | 431.67                         | 0.989 |
| BDE(C-R) <sub>2</sub> |                 |                        |                    |                                |       |
| No.                   | $E_A$ (Hartree) | $E_{B\cdot}$ (Hartree) | $E_{AB}$ (Hartree) | BDE(C-R) <sub>2</sub> (kJ/mol) | MBO   |
| <b>A1-NO(1)</b>       | –               | –                      | –                  | –                              | –     |
| <b>A2-NO(1)</b>       | -1319.62194     | -653.2227753           | -1973.022199       | 465.98                         | 0.909 |
| <b>A3-NO(1)</b>       | -920.6109437    | -254.2728934           | -1175.002466       | 311.46                         | 0.812 |
| <b>A4-NO(1)</b>       | -926.7150701    | -260.3186097           | -1187.21187        | 467.84                         | 0.906 |
| <b>A5-NO(1)</b>       | -871.392468     | -205.058329            | -1076.564087       | 297.44                         | 0.75  |
| <b>A6-NO(1)</b>       | -946.5733575    | -280.1910576           | -1226.928438       | 430.64                         | 0.978 |
| BDE(N=N) <sub>1</sub> |                 |                        |                    |                                |       |
| No.                   | $E_A$ (Hartree) | $E_{B\cdot}$ (Hartree) | $E_{AB}$ (Hartree) | BDE(N=N) <sub>1</sub> (kJ/mol) | MBO   |
| <b>A1-NO(1)</b>       | -296.1420419    | -371.3260113           | -667.5956648       | 335.04                         | 1.418 |
| <b>A2-NO(1)</b>       | -1024.040159    | -948.8547374           | -1973.022199       | 334.23                         | 1.408 |
| <b>A3-NO(1)</b>       | -625.0293899    | -549.8448938           | -1175.002466       | 336.54                         | 1.414 |
| <b>A4-NO(1)</b>       | -631.134636     | -555.9501988           | -1187.21187        | 333.53                         | 1.411 |
| <b>A5-NO(1)</b>       | -575.8111251    | -500.62581             | -1076.564087       | 333.84                         | 1.412 |
| <b>A6-NO(1)</b>       | -650.9922921    | -575.8078519           | -1226.928438       | 336.83                         | 1.415 |
| BDE(C-R) <sub>1</sub> |                 |                        |                    |                                |       |
| No.                   | $E_A$ (Hartree) | $E_{B\cdot}$ (Hartree) | $E_{AB}$ (Hartree) | BDE(C-R) <sub>1</sub> (kJ/mol) | MBO   |
| <b>B1-NO(1)</b>       | –               | –                      | –                  | –                              | –     |
| <b>B2-NO(1)</b>       | -1319.650873    | -653.2227753           | -1973.046132       | 452.86                         | 0.894 |
| <b>B3-NO(1)</b>       | -920.6385705    | -254.2728934           | -1175.024186       | 295.95                         | 0.829 |
| <b>B4-NO(1)</b>       | -926.7490543    | -260.3186097           | -1187.244494       | 464.27                         | 0.943 |
| <b>B5-NO(1)</b>       | -871.4171387    | -205.058329            | -1076.580093       | 274.69                         | 0.741 |
| <b>B6-NO(1)</b>       | -946.6088011    | -280.1910576           | -1226.962676       | 427.48                         | 0.797 |
| BDE(C-R) <sub>2</sub> |                 |                        |                    |                                |       |
| No.                   | $E_A$ (Hartree) | $E_{B\cdot}$ (Hartree) | $E_{AB}$ (Hartree) | BDE(C-R) <sub>2</sub> (kJ/mol) | MBO   |
| <b>B1-NO(1)</b>       | –               | –                      | –                  | –                              | –     |
| <b>B2-NO(1)</b>       | -1319.654036    | -653.2227753           | -1973.046132       | 444.55                         | 0.889 |
| <b>B3-NO(1)</b>       | -920.6429325    | -254.2728934           | -1175.024186       | 284.50                         | 0.823 |
| <b>B4-NO(1)</b>       | -926.751076     | -260.3186097           | -1187.244494       | 458.96                         | 0.935 |
| <b>B5-NO(1)</b>       | -871.4194362    | -205.058329            | -1076.580093       | 268.66                         | 0.736 |
| <b>B6-NO(1)</b>       | -946.6109727    | -280.1910576           | -1226.962676       | 421.78                         | 0.75  |

| BDE(N=N) <sub>1</sub> |                 |                        |                    |                                |       |
|-----------------------|-----------------|------------------------|--------------------|--------------------------------|-------|
| No.                   | $E_A$ (Hartree) | $E_{B\cdot}$ (Hartree) | $E_{AB}$ (Hartree) | BDE(N=N) <sub>1</sub> (kJ/mol) | MBO   |
| <b>B1-NO(1)</b>       | -296.1580425    | -371.3413456           | -667.6337269       | 352.71                         | 1.42  |
| <b>B2-NO(1)</b>       | -1024.04598     | -948.8631611           | -1973.046132       | 359.67                         | 1.457 |
| <b>B3-NO(1)</b>       | -625.0375264    | -549.8547236           | -1175.024186       | 346.40                         | 1.413 |
| <b>B4-NO(1)</b>       | -631.1465814    | -555.9623908           | -1187.244494       | 355.81                         | 1.423 |
| <b>B5-NO(1)</b>       | -575.8154462    | -500.634089            | -1076.580093       | 342.78                         | 1.411 |
| <b>B6-NO(1)</b>       | -651.0062252    | -575.8229375           | -1226.962676       | 350.54                         | 1.432 |
| BDE(C-R) <sub>1</sub> |                 |                        |                    |                                |       |
| No.                   | $E_A$ (Hartree) | $E_{B\cdot}$ (Hartree) | $E_{AB}$ (Hartree) | BDE(C-R) <sub>1</sub> (kJ/mol) | MBO   |
| <b>C1-NO(1)</b>       | –               | –                      | –                  | –                              | –     |
| <b>C2-NO(1)</b>       | -1319.703445    | -653.2227753           | -1973.105804       | 471.50                         | 0.902 |
| <b>C3-NO(1)</b>       | -920.6895226    | -254.2728934           | -1175.07537        | 296.56                         | 0.819 |
| <b>C4-NO(1)</b>       | -926.7982754    | -260.3186097           | -1187.293495       | 463.69                         | 0.924 |
| <b>C5-NO(1)</b>       | -871.4670855    | -205.058329            | -1076.63633        | 291.21                         | 0.767 |
| <b>C6-NO(1)</b>       | -946.6562342    | -280.1910576           | -1227.009768       | 426.58                         | 0.979 |
| BDE(C-R) <sub>2</sub> |                 |                        |                    |                                |       |
| No.                   | $E_A$ (Hartree) | $E_{B\cdot}$ (Hartree) | $E_{AB}$ (Hartree) | BDE(C-R) <sub>2</sub> (kJ/mol) | MBO   |
| <b>C1-NO(1)</b>       | –               | –                      | –                  | –                              | –     |
| <b>C2-NO(1)</b>       | -1319.703536    | -653.2227753           | -1973.105804       | 471.26                         | 0.899 |
| <b>C3-NO(1)</b>       | -920.6865222    | -254.2728934           | -1175.07537        | 304.44                         | 0.83  |
| <b>C4-NO(1)</b>       | -926.7967563    | -260.3186097           | -1187.293495       | 467.68                         | 0.932 |
| <b>C5-NO(1)</b>       | -871.4699326    | -205.058329            | -1076.63633        | 283.73                         | 0.745 |
| <b>C6-NO(1)</b>       | -946.6537415    | -280.1910576           | -1227.009768       | 433.13                         | 0.988 |
| BDE(N=N) <sub>1</sub> |                 |                        |                    |                                |       |
| No.                   | $E_A$ (Hartree) | $E_{B\cdot}$ (Hartree) | $E_{AB}$ (Hartree) | BDE(N=N) <sub>1</sub> (kJ/mol) | MBO   |
| <b>C1-NO(1)</b>       | -296.1724438    | -371.373997            | -667.6811462       | 353.67                         | 1.445 |
| <b>C2-NO(1)</b>       | -1024.086346    | -948.8813621           | -1973.105804       | 362.57                         | 1.436 |
| <b>C3-NO(1)</b>       | -625.0762362    | -549.8723549           | -1175.07537        | 332.86                         | 1.422 |
| <b>C4-NO(1)</b>       | -631.1800979    | -555.9785173           | -1187.293495       | 354.13                         | 1.44  |
| <b>C5-NO(1)</b>       | -575.8581409    | -500.653045            | -1076.63633        | 328.57                         | 1.43  |
| <b>C6-NO(1)</b>       | -651.0402254    | -575.8385514           | -1227.009768       | 343.92                         | 1.418 |
| BDE(C-R) <sub>1</sub> |                 |                        |                    |                                |       |
| No.                   | $E_A$ (Hartree) | $E_{B\cdot}$ (Hartree) | $E_{AB}$ (Hartree) | BDE(C-R) <sub>1</sub> (kJ/mol) | MBO   |
| <b>D1-NO(1)</b>       | –               | –                      | –                  | –                              | –     |
| <b>D2-NO(1)</b>       | -1319.733271    | -653.2227753           | -1973.131117       | 459.65                         | 0.906 |
| <b>D3-NO(1)</b>       | -920.7231932    | -254.2728934           | -1175.11014        | 299.45                         | 0.836 |
| <b>D4-NO(1)</b>       | -926.832817     | -260.3186097           | -1187.329998       | 468.84                         | 0.915 |
| <b>D5-NO(1)</b>       | -871.505618     | -205.058329            | -1076.675687       | 293.37                         | 0.74  |
| <b>D6-NO(1)</b>       | -946.6904166    | -280.1910576           | -1227.044233       | 427.32                         | 1.029 |
| BDE(C-R) <sub>2</sub> |                 |                        |                    |                                |       |
| No.                   | $E_A$ (Hartree) | $E_{B\cdot}$ (Hartree) | $E_{AB}$ (Hartree) | BDE(C-R) <sub>2</sub> (kJ/mol) | MBO   |
| <b>D1-NO(1)</b>       | –               | –                      | –                  | –                              | –     |

| <b>D2-NO(1)</b>       | -1319.735239    | -653.2227753    | -1973.131117       | 454.48                         | 0.895 |
|-----------------------|-----------------|-----------------|--------------------|--------------------------------|-------|
| <b>D3-NO(1)</b>       | -920.7239447    | -254.2728934    | -1175.11014        | 297.47                         | 0.832 |
| <b>D4-NO(1)</b>       | -926.8336035    | -260.3186097    | -1187.329998       | 466.77                         | 0.91  |
| <b>D5-NO(1)</b>       | -871.5073507    | -205.058329     | -1076.675687       | 288.82                         | 0.732 |
| <b>D6-NO(1)</b>       | -946.6903379    | -280.1910576    | -1227.044233       | 427.53                         | 1.045 |
| BDE(N=N) <sub>1</sub> |                 |                 |                    |                                |       |
| No.                   | $E_A$ (Hartree) | $E_B$ (Hartree) | $E_{AB}$ (Hartree) | BDE(N=N) <sub>1</sub> (kJ/mol) | MBO   |
| <b>D1-NO(1)</b>       | -296.1869425    | -371.3927118    | -667.7108498       | 344.45                         | 1.434 |
| <b>D2-NO(1)</b>       | -1024.104087    | -948.8960503    | -1973.131117       | 343.89                         | 1.43  |
| <b>D3-NO(1)</b>       | -625.092654     | -549.8857932    | -1175.11014        | 345.76                         | 1.432 |
| <b>D4-NO(1)</b>       | -631.2026354    | -555.9984084    | -1187.329998       | 338.57                         | 1.425 |
| <b>D5-NO(1)</b>       | -575.8766772    | -500.6686345    | -1076.675687       | 342.30                         | 1.425 |
| <b>D6-NO(1)</b>       | -651.0596279    | -575.8537433    | -1227.044233       | 343.58                         | 1.428 |
| BDE(C-R) <sub>1</sub> |                 |                 |                    |                                |       |
| No.                   | $E_A$ (Hartree) | $E_B$ (Hartree) | $E_{AB}$ (Hartree) | BDE(C-R) <sub>1</sub> (kJ/mol) | MBO   |
| <b>E1-NO(1)</b>       | –               | –               | –                  | –                              | –     |
| <b>E2-NO(1)</b>       | -1319.628199    | -653.2227753    | -1973.028101       | 465.05                         | 0.895 |
| <b>E3-NO(1)</b>       | -920.6185646    | -254.2728934    | -1175.009386       | 309.62                         | 0.792 |
| <b>E4-NO(1)</b>       | -926.723672     | -260.3186097    | -1187.218634       | 463.01                         | 0.904 |
| <b>E5-NO(1)</b>       | -871.4000409    | -205.058329     | -1076.572551       | 299.78                         | 0.739 |
| <b>E6-NO(1)</b>       | -946.5824426    | -280.1910576    | -1226.93683        | 428.82                         | 0.981 |
| BDE(C-R) <sub>2</sub> |                 |                 |                    |                                |       |
| No.                   | $E_A$ (Hartree) | $E_B$ (Hartree) | $E_{AB}$ (Hartree) | BDE(C-R) <sub>2</sub> (kJ/mol) | MBO   |
| <b>E1-NO(1)</b>       | –               | –               | –                  | –                              | –     |
| <b>E2-NO(1)</b>       | -1319.631554    | -653.2227753    | -1973.028101       | 456.24                         | 0.886 |
| <b>E3-NO(1)</b>       | -920.6208321    | -254.2728934    | -1175.009386       | 303.67                         | 0.788 |
| <b>E4-NO(1)</b>       | -926.7244159    | -260.3186097    | -1187.218634       | 461.06                         | 0.899 |
| <b>E5-NO(1)</b>       | -871.4029737    | -205.058329     | -1076.572551       | 292.08                         | 0.731 |
| <b>E6-NO(1)</b>       | -946.5838389    | -280.1910576    | -1226.93683        | 425.16                         | 0.969 |
| BDE(N=N) <sub>1</sub> |                 |                 |                    |                                |       |
| No.                   | $E_A$ (Hartree) | $E_B$ (Hartree) | $E_{AB}$ (Hartree) | BDE(N=N) <sub>1</sub> (kJ/mol) | MBO   |
| <b>E1-NO(1)</b>       | -296.1479234    | -371.3332499    | -667.6057596       | 327.10                         | 1.382 |
| <b>E2-NO(1)</b>       | -948.8583439    | -1024.045515    | -1973.028101       | 326.20                         | 1.372 |
| <b>E3-NO(1)</b>       | -549.8506959    | -625.0357166    | -1175.009386       | 322.87                         | 1.376 |
| <b>E4-NO(1)</b>       | -555.9553116    | -631.1395195    | -1187.218634       | 325.04                         | 1.374 |
| <b>E5-NO(1)</b>       | -500.6307105    | -575.8174712    | -1076.572551       | 326.53                         | 1.374 |
| <b>E6-NO(1)</b>       | -575.8131728    | -650.9987618    | -1226.93683        | 327.91                         | 1.377 |
| BDE(C-R) <sub>1</sub> |                 |                 |                    |                                |       |
| No.                   | $E_A$ (Hartree) | $E_B$ (Hartree) | $E_{AB}$ (Hartree) | BDE(C-R) <sub>1</sub> (kJ/mol) | MBO   |
| <b>F1-NO(1)</b>       | –               | –               | –                  | –                              | –     |
| <b>F2-NO(1)</b>       | -1319.668145    | -653.2227753    | -1973.063131       | 452.14                         | 0.878 |
| <b>F3-NO(1)</b>       | -920.6558871    | -254.2728934    | -1175.041269       | 295.34                         | 0.834 |
| <b>F4-NO(1)</b>       | -926.7655215    | -260.3186097    | -1187.25967        | 460.88                         | 0.939 |

| <b>F5-NO(1)</b>       | -871.4437201    | -205.058329            | -1076.599888       | 256.88                         | 0.719 |
|-----------------------|-----------------|------------------------|--------------------|--------------------------------|-------|
| <b>F6-NO(1)</b>       | -946.6268843    | -280.1910576           | -1226.980979       | 428.05                         | 1.036 |
| BDE(C-R) <sub>2</sub> |                 |                        |                    |                                |       |
| <b>No.</b>            | $E_A$ (Hartree) | $E_{B\cdot}$ (Hartree) | $E_{AB}$ (Hartree) | BDE(C-R) <sub>2</sub> (kJ/mol) | MBO   |
| <b>F1-NO(1)</b>       | –               | –                      | –                  | –                              | –     |
| <b>F2-NO(1)</b>       | -1319.67334     | -653.2227753           | -1973.063131       | 438.50                         | 0.865 |
| <b>F3-NO(1)</b>       | -920.6615721    | -254.2728934           | -1175.041269       | 280.41                         | 0.83  |
| <b>F4-NO(1)</b>       | -926.7702673    | -260.3186097           | -1187.25967        | 448.42                         | 0.923 |
| <b>F5-NO(1)</b>       | -871.4427862    | -205.058329            | -1076.599888       | 259.33                         | 0.723 |
| <b>F6-NO(1)</b>       | -946.6300412    | -280.1910576           | -1226.980979       | 419.77                         | 1.064 |
| BDE(N=N) <sub>1</sub> |                 |                        |                    |                                |       |
| <b>No.</b>            | $E_A$ (Hartree) | $E_{B\cdot}$ (Hartree) | $E_{AB}$ (Hartree) | BDE(N=N) <sub>1</sub> (kJ/mol) | MBO   |
| <b>F1-NO(1)</b>       | -296.1687509    | -371.3539854           | -667.6515353       | 338.16                         | 1.42  |
| <b>F2-NO(1)</b>       | -948.8730369    | -1024.057161           | -1973.063131       | 349.02                         | 1.425 |
| <b>F3-NO(1)</b>       | -549.865938     | -625.0510725           | -1175.041269       | 326.24                         | 1.396 |
| <b>F4-NO(1)</b>       | -555.9727989    | -631.1582185           | -1187.25967        | 337.78                         | 1.396 |
| <b>F5-NO(1)</b>       | -500.6455555    | -575.8267488           | -1076.599888       | 334.97                         | 1.403 |
| <b>F6-NO(1)</b>       | -575.8344006    | -651.0193497           | -1226.980979       | 334.04                         | 1.434 |

**Table S7.** Calculation results of the bond dissociation enthalpy (BDE(C-R)<sub>2</sub> and BDE(N=N)<sub>2</sub>) and Mayer bond order (MBO) of azobis-triazole derivatives with *N*-Oxide groups in azoles.

| BDE(C-R) <sub>2</sub> |                 |                        |                    |                                |       |
|-----------------------|-----------------|------------------------|--------------------|--------------------------------|-------|
| No.                   | $E_A$ (Hartree) | $E_{B\cdot}$ (Hartree) | $E_{AB}$ (Hartree) | BDE(C-R) <sub>2</sub> (kJ/mol) | MBO   |
| A1-NO(2)              | –               | –                      | –                  | –                              | –     |
| A2-NO(2)              | -1394.74254     | -653.2227753           | -2048.180697       | 565.49                         | 0.885 |
| A3-NO(2)              | -995.7299387    | -254.2728934           | -1250.154052       | 397.03                         | 0.820 |
| A4-NO(2)              | -1001.840543    | -260.3186097           | -1262.372962       | 561.35                         | 0.914 |
| A5-NO(2)              | -946.5276208    | -205.058329            | -1151.707837       | 320.01                         | 0.765 |
| A6-NO(2)              | -1021.71963     | -280.1910576           | -1302.088276       | 466.26                         | 0.751 |
| BDE(N=N) <sub>2</sub> |                 |                        |                    |                                |       |
| No.                   | $E_A$ (Hartree) | $E_{B\cdot}$ (Hartree) | $E_{AB}$ (Hartree) | BDE(N=N) <sub>2</sub> (kJ/mol) | MBO   |
| A1-NO(2)              | -371.2985604    | -371.2985604           | -742.7598199       | 427.17                         | 1.579 |
| A2-NO(2)              | -1024.008117    | -1024.008117           | -2048.180697       | 431.80                         | 1.589 |
| A3-NO(2)              | -624.9943891    | -624.9943891           | -1250.154052       | 433.93                         | 1.583 |
| A4-NO(2)              | -631.1060815    | -631.1060815           | -1262.372962       | 422.18                         | 1.576 |
| A5-NO(2)              | -575.7717336    | -575.7717336           | -1151.707837       | 431.55                         | 1.583 |
| A6-NO(2)              | -650.9624788    | -650.9624788           | -1302.088276       | 428.79                         | 1.580 |
| BDE(C-R) <sub>2</sub> |                 |                        |                    |                                |       |
| No.                   | $E_A$ (Hartree) | $E_{B\cdot}$ (Hartree) | $E_{AB}$ (Hartree) | BDE(C-R) <sub>2</sub> (kJ/mol) | MBO   |
| B1-NO(2)              | –               | –                      | –                  | –                              | –     |
| B2-NO(2)              | -1394.82997     | -653.2227753           | -2048.192549       | 367.05                         | 0.912 |
| B3-NO(2)              | -995.8192748    | -254.2728934           | -1250.171293       | 207.74                         | 0.884 |
| B4-NO(2)              | -1001.929818    | -260.3186097           | -1262.393354       | 380.50                         | 1.005 |
| B5-NO(2)              | -946.5961685    | -205.058329            | -1151.726137       | 188.09                         | 0.821 |
| B6-NO(2)              | -1021.791591    | -280.1910576           | -1302.116821       | 352.27                         | 0.896 |
| BDE(N=N) <sub>2</sub> |                 |                        |                    |                                |       |
| No.                   | $E_A$ (Hartree) | $E_{B\cdot}$ (Hartree) | $E_{AB}$ (Hartree) | BDE(N=N) <sub>2</sub> (kJ/mol) | MBO   |
| B1-NO(2)              | -371.3124138    | -371.3124138           | -742.7889879       | 431.00                         | 1.583 |
| B2-NO(2)              | -1024.015188    | -1024.015188           | -2048.192549       | 425.78                         | 1.698 |
| B3-NO(2)              | -625.0072756    | -625.0072756           | -1250.171293       | 411.52                         | 1.623 |
| B4-NO(2)              | -631.117077     | -631.117077            | -1262.393354       | 417.98                         | 1.655 |
| B5-NO(2)              | -575.7862862    | -575.7862862           | -1151.726137       | 403.18                         | 1.645 |
| B6-NO(2)              | -650.9789683    | -650.9789683           | -1302.116821       | 417.15                         | 1.635 |
| BDE(C-R) <sub>2</sub> |                 |                        |                    |                                |       |
| No.                   | $E_A$ (Hartree) | $E_{B\cdot}$ (Hartree) | $E_{AB}$ (Hartree) | BDE(C-R) <sub>2</sub> (kJ/mol) | MBO   |
| C1-NO(2)              | –               | –                      | –                  | –                              | –     |
| C2-NO(2)              | -1394.825086    | -653.2227753           | -2048.225209       | 465.63                         | 0.865 |
| C3-NO(2)              | -995.8093328    | -254.2728934           | -1250.198531       | 305.36                         | 0.832 |
| C4-NO(2)              | -1001.915561    | -260.3186097           | -1262.422139       | 493.51                         | 0.947 |
| C5-NO(2)              | -946.585756     | -205.058329            | -1151.750136       | 278.44                         | 0.745 |
| C6-NO(2)              | -1021.75342     | -280.1910576           | -1302.135279       | 500.95                         | 1.095 |
| BDE(N=N) <sub>2</sub> |                 |                        |                    |                                |       |

| No.             | $E_A$ (Hartree) | $E_{B\cdot}$ (Hartree) | $E_{AB}$ (Hartree) | BDE(N=N) <sub>2</sub> (kJ/mol) | MBO   |
|-----------------|-----------------|------------------------|--------------------|--------------------------------|-------|
| <b>C1-NO(2)</b> | -371.3228477    | -371.3228477           | -742.8073251       | 424.36                         | 1.593 |
| <b>C2-NO(2)</b> | -1024.032206    | -1024.032206           | -2048.225209       | 422.17                         | 1.568 |
| <b>C3-NO(2)</b> | -625.018855     | -625.018855            | -1250.198531       | 422.24                         | 1.569 |
| <b>C4-NO(2)</b> | -631.128344     | -631.128344            | -1262.422139       | 434.39                         | 1.575 |
| <b>C5-NO(2)</b> | -575.7979648    | -575.7979648           | -1151.750136       | 404.87                         | 1.569 |
| <b>C6-NO(2)</b> | -650.9881736    | -650.9881736           | -1302.135279       | 417.28                         | 1.559 |

  

| BDE(C-R) <sub>2</sub> |                 |                        |                    |                                |       |
|-----------------------|-----------------|------------------------|--------------------|--------------------------------|-------|
| No.                   | $E_A$ (Hartree) | $E_{B\cdot}$ (Hartree) | $E_{AB}$ (Hartree) | BDE(C-R) <sub>2</sub> (kJ/mol) | MBO   |
| <b>D1-NO(2)</b>       | –               | –                      | –                  | –                              | –     |
| <b>D2-NO(2)</b>       | -1394.894119    | -653.2227753           | -2048.267456       | 395.30                         | 0.922 |
| <b>D3-NO(2)</b>       | -995.8796536    | -254.2728934           | -1250.23873        | 226.27                         | 0.891 |
| <b>D4-NO(2)</b>       | -1001.992453    | -260.3186097           | -1262.461759       | 395.65                         | 0.938 |
| <b>D5-NO(2)</b>       | -946.6615709    | -205.058329            | -1151.802939       | 218.02                         | 0.8   |
| <b>D6-NO(2)</b>       | -1021.852435    | -280.1910576           | -1302.183308       | 367.08                         | 1.239 |

  

| BDE(N=N) <sub>2</sub> |                 |                        |                    |                                |       |
|-----------------------|-----------------|------------------------|--------------------|--------------------------------|-------|
| No.                   | $E_A$ (Hartree) | $E_{B\cdot}$ (Hartree) | $E_{AB}$ (Hartree) | BDE(N=N) <sub>2</sub> (kJ/mol) | MBO   |
| <b>D1-NO(2)</b>       | -371.3437213    | -371.3437213           | -742.8439647       | 410.95                         | 1.579 |
| <b>D2-NO(2)</b>       | -1024.051886    | -1024.051886           | -2048.267456       | 429.75                         | 1.611 |
| <b>D3-NO(2)</b>       | -625.0383873    | -625.0383873           | -1250.23873        | 425.21                         | 1.599 |
| <b>D4-NO(2)</b>       | -631.1543347    | -631.1543347           | -1262.461759       | 401.94                         | 1.567 |
| <b>D5-NO(2)</b>       | -575.8191266    | -575.8191266           | -1151.802939       | 432.38                         | 1.61  |
| <b>D6-NO(2)</b>       | -651.0751842    | -651.0751842           | -1302.308617       | 415.48                         | 1.572 |

  

| BDE(C-R) <sub>2</sub> |                 |                        |                    |                                |       |
|-----------------------|-----------------|------------------------|--------------------|--------------------------------|-------|
| No.                   | $E_A$ (Hartree) | $E_{B\cdot}$ (Hartree) | $E_{AB}$ (Hartree) | BDE(C-R) <sub>2</sub> (kJ/mol) | MBO   |
| <b>E1-NO(2)</b>       | –               | –                      | –                  | –                              | –     |
| <b>E2-NO(2)</b>       | -1394.75454     | -653.2227753           | -2048.165036       | 492.86                         | 0.88  |
| <b>E3-NO(2)</b>       | -995.7415343    | -254.2728934           | -1250.139666       | 328.81                         | 0.814 |
| <b>E4-NO(2)</b>       | -1001.847018    | -260.3186097           | -1262.350517       | 485.43                         | 0.911 |
| <b>E5-NO(2)</b>       | -946.5208221    | -205.058329            | -1151.698082       | 312.25                         | 0.769 |
| <b>E6-NO(2)</b>       | -1021.707187    | -280.1910576           | -1302.070958       | 453.46                         | 1.066 |

  

| BDE(N=N) <sub>2</sub> |                 |                        |                    |                                |       |
|-----------------------|-----------------|------------------------|--------------------|--------------------------------|-------|
| No.                   | $E_A$ (Hartree) | $E_{B\cdot}$ (Hartree) | $E_{AB}$ (Hartree) | BDE(N=N) <sub>2</sub> (kJ/mol) | MBO   |
| <b>E1-NO(2)</b>       | -371.2921202    | -371.2921202           | -742.7424307       | 415.33                         | 1.604 |
| <b>E2-NO(2)</b>       | -1024.00243     | -1024.00243            | -2048.165036       | 420.54                         | 1.614 |
| <b>E3-NO(2)</b>       | -624.989847     | -624.989847            | -1250.139666       | 420.01                         | 1.611 |
| <b>E4-NO(2)</b>       | -631.0958828    | -631.0958828           | -1262.350517       | 416.80                         | 1.609 |
| <b>E5-NO(2)</b>       | -575.7692267    | -575.7692267           | -1151.698082       | 419.10                         | 1.61  |
| <b>E6-NO(2)</b>       | -650.9554906    | -650.9554906           | -1302.070958       | 420.02                         | 1.611 |

  

| BDE(C-R) <sub>2</sub> |                 |                        |                    |                                |       |
|-----------------------|-----------------|------------------------|--------------------|--------------------------------|-------|
| No.                   | $E_A$ (Hartree) | $E_{B\cdot}$ (Hartree) | $E_{AB}$ (Hartree) | BDE(C-R) <sub>2</sub> (kJ/mol) | MBO   |
| <b>F1-NO(2)</b>       | –               | –                      | –                  | –                              | –     |
| <b>F2-NO(2)</b>       | -1394.821469    | -653.2227753           | -2048.185854       | 371.80                         | 0.896 |

| <b>F3-NO(2)</b>       | -995.8094802    | -254.2728934           | -1250.163321       | 212.53                         | 0.875 |
|-----------------------|-----------------|------------------------|--------------------|--------------------------------|-------|
| <b>F4-NO(2)</b>       | -1001.921722    | -260.3186097           | -1262.388235       | 388.32                         | 0.998 |
| <b>F5-NO(2)</b>       | -946.5843934    | -205.058329            | -1151.71315        | 184.91                         | 0.775 |
| <b>F6-NO(2)</b>       | -1021.782644    | -280.1910576           | -1302.110223       | 358.44                         | 1.199 |
| BDE(N=N) <sub>2</sub> |                 |                        |                    |                                |       |
| <b>No.</b>            | $E_A$ (Hartree) | $E_{B\cdot}$ (Hartree) | $E_{AB}$ (Hartree) | BDE(N=N) <sub>2</sub> (kJ/mol) | MBO   |
| <b>F1-NO(2)</b>       | -371.3096241    | -371.3096241           | -742.7790443       | 419.54                         | 1.634 |
| <b>F2-NO(2)</b>       | -1024.010646    | -1024.010646           | -2048.185854       | 432.06                         | 1.697 |
| <b>F3-NO(2)</b>       | -625.0032828    | -625.0032828           | -1250.163321       | 411.56                         | 1.636 |
| <b>F4-NO(2)</b>       | -631.1136693    | -631.1136693           | -1262.388235       | 422.43                         | 1.675 |
| <b>F5-NO(2)</b>       | -575.7813225    | -575.7813225           | -1151.71315        | 395.15                         | 1.653 |
| <b>F6-NO(2)</b>       | -650.9756389    | -650.9756389           | -1302.110223       | 417.31                         | 1.645 |



**Figure S1.** The effects of *N*-oxide groups on the density of different linkage modes of azobis-triazole derivatives.

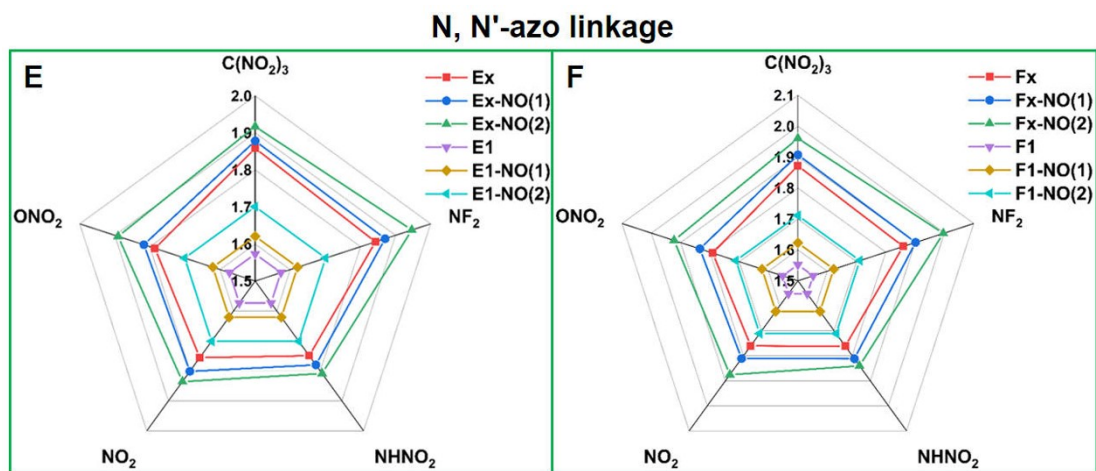

**Figure S2a.** The effects of *N*-oxide groups on the detonation pressure of different linkage modes of azobis-triazole derivatives.

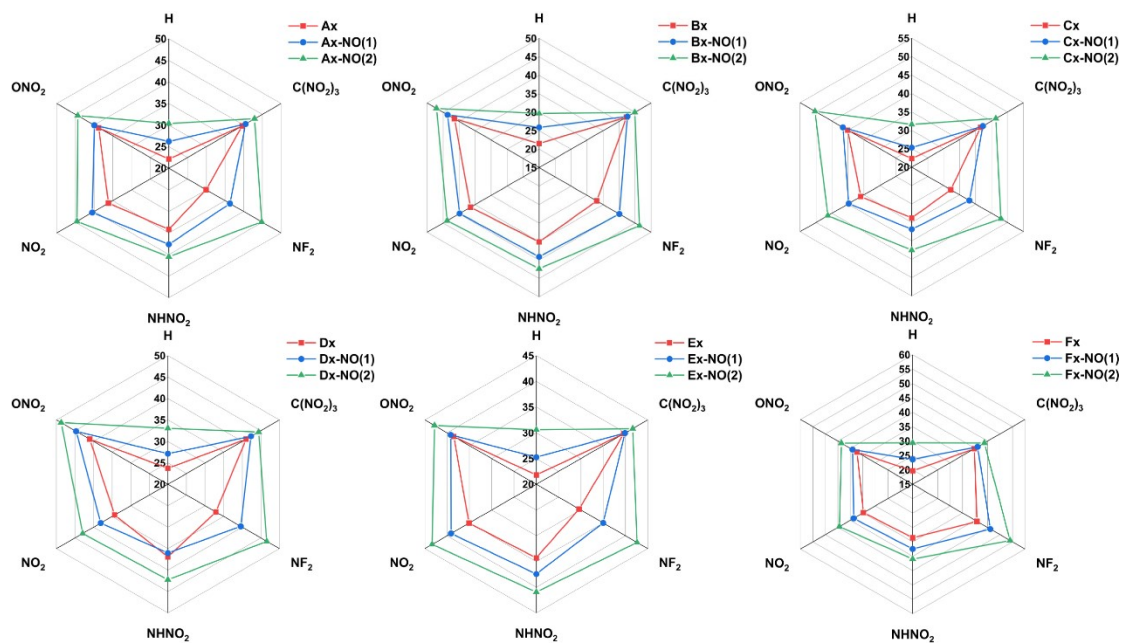

**Figure S2b.** The effects of *N*-oxide groups on the detonation heat of different linkage modes of azobis-triazole derivatives.

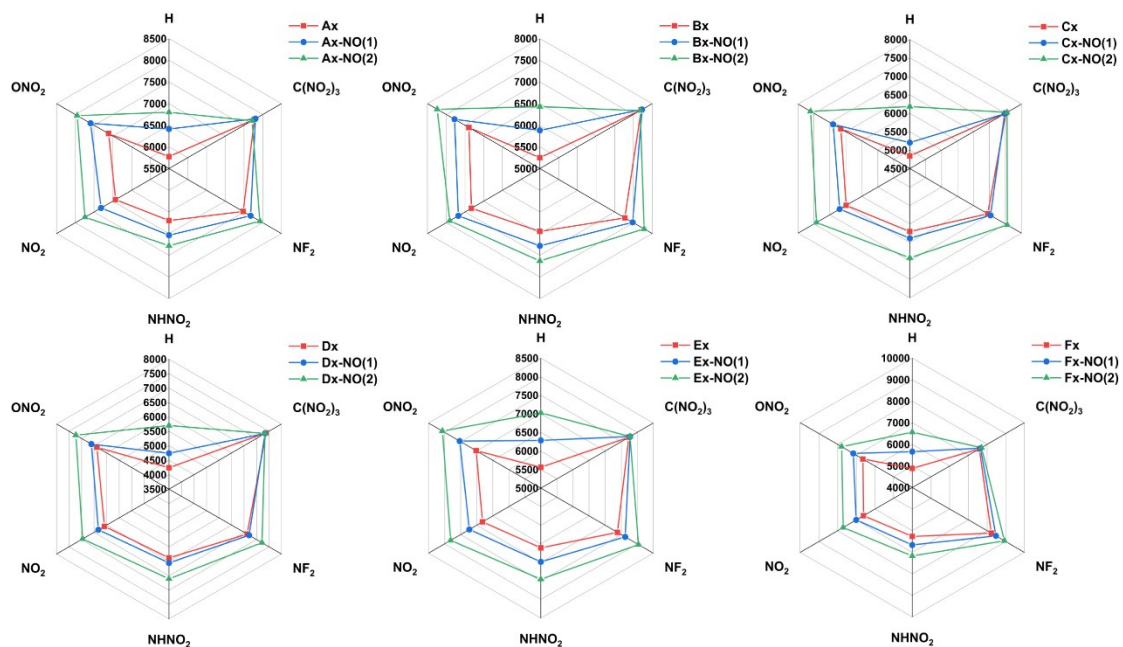

**Figure S3.** The effects of *N*-oxide groups on the azo bond dissociation enthalpy of different linkage modes of azobis-triazole derivatives.

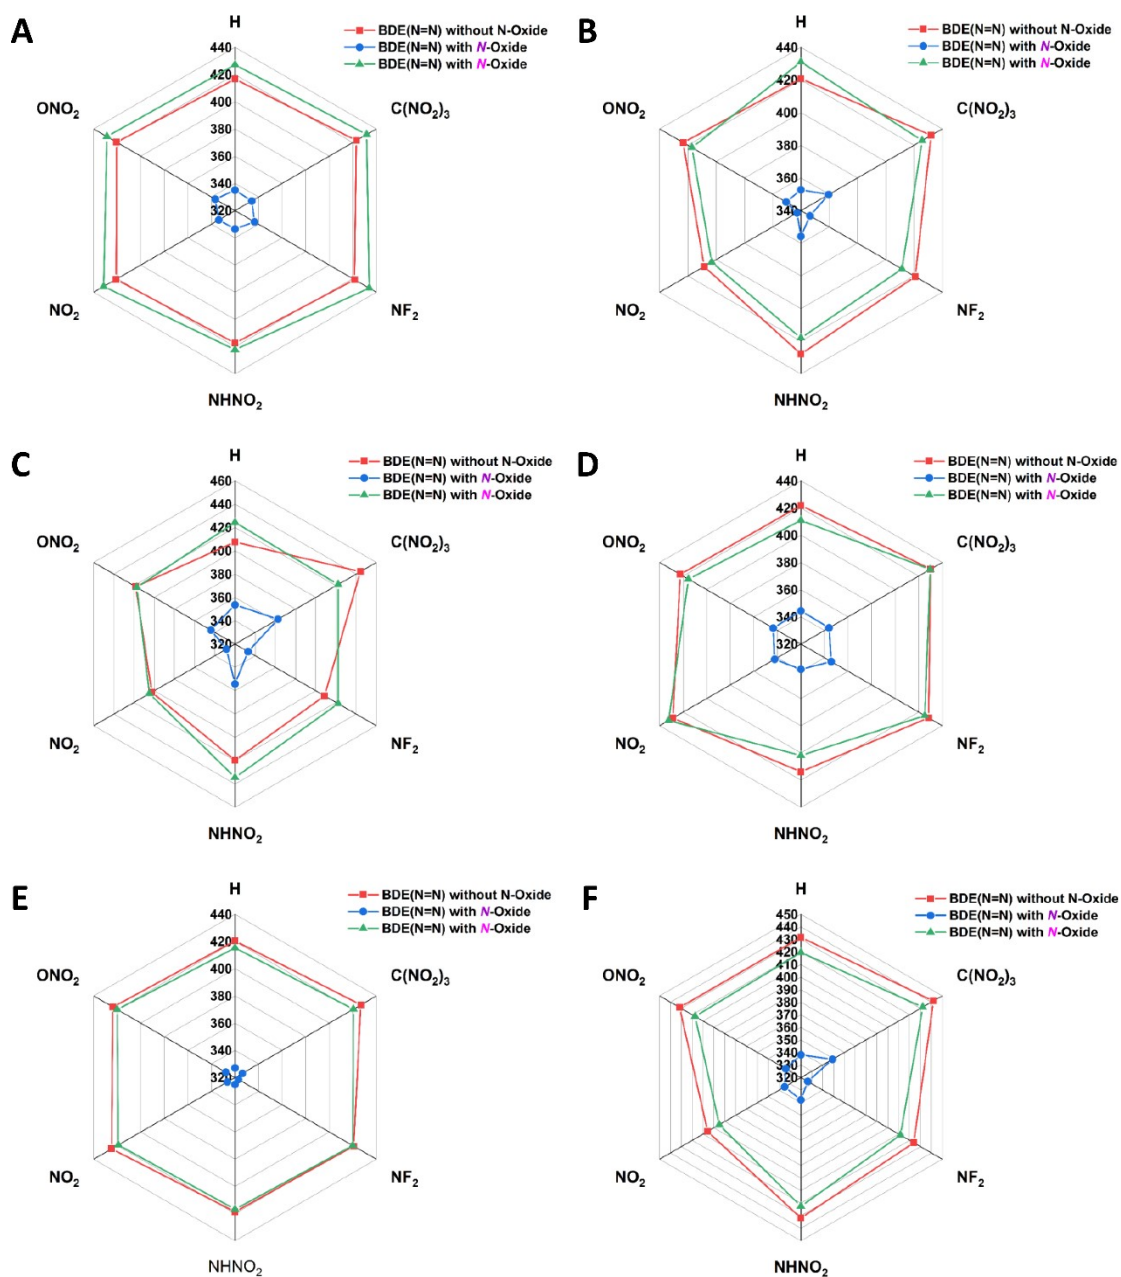

Supplement: d4cp00183d1.pdf [file d4cp00183d1.pdf]
